# Supplementary material for: Effect of Celastrol on LncRNAs and mRNAs Profiles of Cerebral Ischemia-Reperfusion Injury in Transient Middle Cerebral Artery Occlusion Mice Model
Source: Front Neurosci. 2022 May 23;16:889292. doi: 10.3389/fnins.2022.889292 (PMC9169531; doi:10.3389/fnins.2022.889292)
Supplement: Supplementary file 1 [file Table_1.XLSX]

## Sheet: Sheet1
GENE	Forward Primer ( 5' - 3' )	Reverse Primer ( 5' - 3' )
GAPDH	AGGTCGGTGTGAACGGATTTG	TGTAGACCATGTAGTTGAGGTCA
Slc16a4	AAGTCGGAGGGGACTCTGATA	CGTGGGGTTGTCTACGAGC
Ascl2	ACCTTCATCGGAAACTCCAAAG	ACTGTTAGGCTCAGGTGAACT
Acod1	TTTGGGGTCGACCAGACTTC	CCATGGAGTGAACAGCAACAC
Sh3bp4	AAGTCGGAGGGGACTCTGATA	CGTGGGGTTGTCTACGAGC
Elavl4	GCCTCAGGTGTCAAATGGACC	ACCCTAAACTCTGTCCTGTGAT
Hif1α	ACCTTCATCGGAAACTCCAAAG	ACTGTTAGGCTCAGGTGAACT
Ftl1	GAGTGAGGCGCTCAAAGAGAT	ATGAATGGGGTAAAACCCAGGA
4930413F20	CCTGGGTGGTAGCTGAGTTG	TTGGTGTGGGTATGATGCCC
5830444B04	ACAACCAAAGGAAAGGCCCA	TCCCAGGGCATAGGTCGTTA
C030005K06	CAGCCTAAGAGAGACCCCCT	GCCTGTCTTGGCGTAGTTCT
Gm15444	GGCTAACGGGACAGAGATCG	AACACTTGGGTTAGCGAGGG
Gm37637	CTGGTGGCATCATCAACCCT	CAGGGCATCAGGCTTGTACA
