# Supplementary material for: Effect of Celastrol on LncRNAs and mRNAs Profiles of Cerebral Ischemia-Reperfusion Injury in Transient Middle Cerebral Artery Occlusion Mice Model
Source: Front Neurosci. 2022 May 23;16:889292. doi: 10.3389/fnins.2022.889292 (PMC9169531; doi:10.3389/fnins.2022.889292)
Supplement: Supplementary file 2 [file Table_2.XLSX]

## Sheet: Supplementary Table 2
gene_name	Sham_1	Sham_2	Sham_3	tMCAO_1	tMCAO_2	tMCAO_3	Sham_mean	tMCAO_mean	baseMean	log2FoldChange	pvalue	padj
B230216N24Rik	167.107	267.448	218.844	120.912	56.7979	83.2586	217.799	86.9894	152.394	-1.32205	1.80238e-07	3.77844e-05
Dlx1as	83.0968	106.095	129.424	24.0045	31.4573	47.8498	106.205	34.4372	70.3212	-1.62545	5.63035e-08	1.59909e-05
5330413P13Rik	49.3102	49.732	36.474	124.468	66.4098	90.9146	45.1721	93.9308	69.5514	1.05116	0.000351813	0.0159075
Gm14317	17.3499	27.6289	20.0018	3.55622	6.11669	7.65597	21.6602	5.77629	13.7183	-1.90862	0.000704696	0.0275429
Gm14342	7.30521	2.21031	2.35316	32.8951	36.7002	10.527	3.95623	26.7074	15.3318	2.70541	4.05498e-05	0.00283357
F630028O10Rik	0.913152	1.10516	0	16.003	6.9905	14.3549	0.672769	12.4495	6.56113	4.15501	0.000531827	0.0428919
C230034O21Rik	53.876	66.3094	40.0037	24.8936	13.981	29.6669	53.3963	22.8472	38.1217	-1.23188	0.000762114	0.0292906
Gm20691	10.9578	20.998	17.6487	2.66717	1.74763	2.87099	16.5348	2.42859	9.48171	-2.76446	0.000172288	0.00925505
Gm42743	8.21837	2.21031	7.05948	51.5653	35.8263	16.2689	5.82938	34.5535	20.1914	2.55261	8.40708e-06	0.000923177
A230001M10Rik	78.5311	37.5753	58.829	18.6702	19.2239	20.0969	58.3118	19.3303	38.8211	-1.6002	1.32133e-05	0.00131261
AI506816	58.4417	83.9919	82.3605	392.963	191.365	532.09	74.9314	372.139	223.535	2.31392	3.81669e-07	6.77022e-05
2210406O10Rik	46.5707	51.9423	35.2974	131.58	82.1384	56.4628	44.6035	90.0605	67.332	1.01257	0.00154822	0.0496837
C030018K13Rik	28.3077	58.5733	48.2397	10.6687	15.7286	12.4409	45.0402	12.9461	28.9932	-1.78914	2.0092e-05	0.00159766
Gm15721	83.0968	120.462	116.481	45.3419	39.3216	33.4949	106.68	39.3861	73.0331	-1.43069	1.46518e-07	3.3787e-05
Clec7a	2.73946	5.52578	1.17658	39.1185	7.86432	37.3228	3.14727	28.1019	15.6246	3.15186	1.22964e-05	0.00128888
AU020206	61.1812	46.4166	76.4777	178.7	76.8956	156.947	61.3585	137.514	99.4364	1.16526	9.30433e-05	0.00561849
C030029H02Rik	47.4839	68.5197	47.0632	15.114	19.2239	11.484	54.3556	15.2739	34.8148	-1.82439	1.2788e-06	0.000210637
B230206H07Rik	63.9206	43.1011	41.1803	30.2279	11.3596	14.3549	49.4007	18.6475	34.0241	-1.41017	0.000467136	0.0199484
H19	2.73946	0	1.17658	65.7902	23.593	35.4088	1.30534	41.5973	21.4513	4.90522	7.14769e-09	3.29652e-06
Gm4798	47.4839	65.2042	76.4777	17.7811	13.1072	17.2259	63.0553	16.0381	39.5467	-1.97062	4.77621e-08	1.57342e-05
Gm48485	13.6973	5.52578	21.1784	57.7886	41.0692	27.7529	13.4672	42.2036	27.8354	1.65704	0.000285892	0.0134544
Gm29674	59.3549	71.8352	54.1226	20.4483	20.9715	40.1938	61.7709	27.2045	44.4877	-1.19005	0.000485441	0.0203532
3930402G23Rik	3.65261	9.94641	5.8829	46.2309	13.981	21.0539	6.49397	27.0886	16.7913	2.08069	0.000450152	0.0195859
Ifi30	42.005	33.1547	48.2397	155.585	90.0027	199.055	41.1331	148.214	94.6737	1.84874	4.95444e-10	5.71246e-07
C230057M02Rik	294.948	486.269	595.349	213.373	176.51	270.83	458.855	220.238	339.547	-1.05738	2.24334e-06	0.000305118
4732419C18Rik	6.39206	7.73609	3.52974	35.5622	37.574	22.0109	5.88596	31.7157	18.8008	2.42005	5.96013e-06	0.000687203
D030055H07Rik	10.0447	28.7341	22.355	7.11245	2.62144	0.956996	20.3779	3.56363	11.9708	-2.49151	0.000282085	0.0134544
Gm47095	0.913152	1.10516	0	22.2264	7.86432	9.56996	0.672769	13.2202	6.9465	4.24544	0.000423154	0.0386348
Snhg15	35.6129	38.6805	31.7676	95.129	68.1574	106.227	35.3537	89.8377	62.5957	1.34219	3.93645e-06	0.000477761
Olfr1372-ps1	10.9578	8.84125	14.119	53.3434	27.962	18.1829	11.306	33.1628	22.2344	1.56001	0.00155127	0.0496837
2410006H16Rik	193.588	165.773	154.132	322.727	418.556	389.497	171.165	376.927	274.046	1.13491	3.76508e-11	8.68228e-08
Gm15892	15.5236	6.63094	8.23605	66.6792	22.7191	16.2689	10.1302	35.2224	22.6763	1.77881	0.00128923	0.0437201
Sap30bpos	0.913152	0	4.70632	20.4483	37.574	9.56996	1.87316	22.5307	12.2019	3.66226	1.74921e-05	0.00145038
Gm26645	15.5236	17.6825	29.4145	2.66717	6.11669	3.82798	20.8735	4.20395	12.5387	-2.29825	0.000203253	0.0104156
A830009L08Rik	77.6179	102.78	83.5371	23.1155	22.7191	53.5918	87.9782	33.1421	60.5602	-1.41485	1.76109e-05	0.00145038
Gm5454	36.5261	43.1011	36.474	17.7811	15.7286	14.3549	38.7004	15.9549	27.3276	-1.2758	0.000983122	0.0359854
Gm20063	61.1812	55.2578	69.4182	28.4498	37.574	23.9249	61.9524	29.9829	45.9676	-1.04217	0.000949038	0.0352981
Gm3693	40.1787	99.4641	75.3011	8.0015	22.7191	40.1938	71.6479	23.6382	47.643	-1.6016	0.000197957	0.0103748
Serpina3h	0	1.10516	0	24.0045	4.36907	5.74198	0.368385	11.3719	5.87012	4.90792	0.000455947	0.0401151
Gm40578	79.4442	47.5217	76.4777	35.5622	26.2144	30.6239	67.8145	30.8002	49.3073	-1.14169	0.000343469	0.0158408
Gm2824	262.988	305.023	264.73	124.468	135.441	152.162	277.58	137.357	207.469	-1.0155	5.45523e-09	3.29652e-06
Gm5468	20.0893	18.7877	17.6487	2.66717	2.62144	2.87099	18.8419	2.71987	10.7809	-2.79616	4.25809e-05	0.00288798
4933432I09Rik	24.6551	56.363	72.9479	12.4468	19.2239	9.56996	51.322	13.7469	32.5344	-1.8844	2.07887e-05	0.00159796
Gm34567	15.5236	53.0475	31.7676	82.6822	168.646	83.2586	33.4462	111.529	72.4876	1.75222	2.24935e-06	0.000305118
9630014M24Rik	23.7419	39.7856	34.1208	12.4468	11.3596	4.78498	32.5495	9.53045	21.04	-1.75625	0.000215892	0.0108228
Gm31087	31.0472	19.8928	12.9424	0.889056	4.36907	4.78498	21.2941	3.3477	12.3209	-2.68944	5.90502e-05	0.00389056
C030005K06Rik	25.5683	34.2598	47.0632	7.11245	11.3596	14.3549	35.6304	10.9423	23.2864	-1.69957	0.000171075	0.00925505
Cd63-ps	22.8288	33.1547	23.5316	84.4603	67.2836	90.9146	26.505	80.8862	53.6956	1.61289	2.05203e-07	3.94333e-05
Gm46637	40.1787	36.4702	52.9461	8.89056	11.3596	25.8389	43.1983	15.363	29.2807	-1.49928	0.000412964	0.0183134
Snhg1	163.454	141.46	117.658	383.183	258.649	280.4	140.857	307.411	224.134	1.12138	1.5784e-08	6.06633e-06
