# Supplementary material for: Effect of Celastrol on LncRNAs and mRNAs Profiles of Cerebral Ischemia-Reperfusion Injury in Transient Middle Cerebral Artery Occlusion Mice Model
Source: Front Neurosci. 2022 May 23;16:889292. doi: 10.3389/fnins.2022.889292 (PMC9169531; doi:10.3389/fnins.2022.889292)
Supplement: Supplementary file 3 [file Table_3.XLSX]

## Sheet: Supplementary Table 3
gene_name	Sham_1	Sham_2	Sham_3	tMCAO_1	tMCAO_2	tMCAO_3	Sham_mean	tMCAO_mean	baseMean	log2FoldChange	pvalue	padj
Pax5	97.7156	6.75851	3.45329	3.55209	1.80488	4.15262	35.9758	3.16986	19.5728	-3.51689	0.00162924	0.0164952
Olfr464	11.0621	32.6661	9.20876	0	0.902438	6.22893	17.6457	2.37712	10.0114	-2.94117	0.00426803	0.0339796
Acsm5	7.37477	27.034	13.8131	1.77605	0	6.22893	16.074	2.66832	9.37116	-2.62591	0.00673479	0.0474658
Egr4	100.481	227.537	568.641	59.4975	42.4146	78.8997	298.886	60.2706	179.578	-2.31025	0.00150566	0.0156311
Capn11	39.6394	30.4133	11.511	8.88023	6.31707	2.07631	27.1879	5.75787	16.4729	-2.22741	0.00134426	0.0143013
Nr4a1	784.491	1290.88	2705.07	442.235	277.951	482.742	1593.48	400.976	997.228	-1.99057	0.000436376	0.00624547
Tcap	43.3267	42.8039	50.6482	7.99221	7.2195	19.7249	45.593	11.6455	28.6193	-1.98916	2.92e-05	0.00073165
Crybb1	54.3889	76.5965	57.5548	7.99221	16.2439	23.8776	62.8467	16.0379	39.4423	-1.98264	5.04e-06	0.00018173
Arc	1336.68	1891.26	6431.17	740.611	755.341	1015.32	3219.7	837.089	2028.4	-1.94346	0.00507481	0.0384307
Akr1c14	20.2806	24.7812	35.684	3.55209	3.60975	14.5342	26.9153	7.232	17.0736	-1.91925	0.00331904	0.0281115
Myom3	54.3889	69.838	66.7635	16.8724	16.2439	17.6486	63.6635	16.9216	40.2926	-1.90959	4.17e-08	3.16e-06
Nr4a3	429.58	555.324	1395.13	140.308	333.902	234.623	793.344	236.278	514.811	-1.74725	0.00480265	0.0368915
Gm11627	47.936	38.2982	34.5329	7.10418	16.2439	13.496	40.2557	12.2814	26.2685	-1.72125	0.00015313	0.00270499
Fam180a	32.2646	34.919	43.7416	9.76825	8.12194	17.6486	36.9751	11.8463	24.4107	-1.65435	0.000367272	0.0054453
Slc2a5	61.7637	100.251	71.3679	22.2006	21.6585	31.1446	77.7943	25.0012	51.3978	-1.64097	2.6e-06	0.000103256
P2ry12	339.239	512.521	477.705	134.091	112.805	207.631	443.155	151.509	297.332	-1.5506	8.33e-10	1.05e-07
Kcnv1	1023.25	2171.74	2086.94	498.181	408.804	942.644	1760.64	616.543	1188.59	-1.51402	0.00200233	0.0193411
Fmod	348.458	295.122	229.068	94.1304	82.1219	131.846	290.882	102.699	196.791	-1.508	5.23e-10	6.89e-08
Il1rapl2	83.888	75.4701	58.7059	31.9688	20.7561	25.9539	72.688	26.2263	49.4571	-1.47325	9.79e-06	0.00030185
Siglech	195.431	225.284	206.046	53.2814	61.3658	116.273	208.92	76.9735	142.947	-1.44686	1.12e-06	5.22e-05
Crh	64.5292	103.631	93.2387	35.5209	15.3414	46.717	87.1328	32.5264	59.8296	-1.42533	0.000642991	0.00828472
Cckbr	725.493	1197.38	1068.22	229.11	323.975	562.68	997.031	371.922	684.476	-1.42314	0.00104056	0.0118366
H2-T24	43.3267	45.0567	33.3818	11.5443	10.8293	23.8776	40.5884	15.417	28.0027	-1.41299	0.00172381	0.0172683
Cort	53.4671	104.757	42.5905	32.8568	14.439	29.0683	66.9382	25.4547	46.1965	-1.39496	0.00311444	0.0269033
H4c14	34.1083	32.6661	27.6263	10.6563	9.02438	16.6105	31.4669	12.097	21.782	-1.3936	0.00220374	0.0208262
Homer1	2332.27	3536.95	7255.35	1745.85	1394.27	1900.86	4374.86	1680.33	3027.59	-1.38045	0.00626126	0.0449517
Myoc	524.53	218.525	249.788	116.331	126.341	142.227	330.948	128.3	229.624	-1.37044	1.75e-05	0.000480232
Slc16a4	32.2646	72.0908	61.0081	17.7605	22.5609	23.8776	55.1212	21.3997	38.2604	-1.36116	0.00121872	0.0132834
Tmem44	1816.04	1884.5	1917.73	530.15	703.902	973.789	1872.75	735.947	1304.35	-1.34859	1.86e-12	4.13e-10
Pcsk1	1044.45	1201.89	1391.67	491.965	309.536	631.198	1212.67	477.566	845.119	-1.34521	3.78e-09	3.95e-07
Etv5	2030.83	2800.28	3007.81	1070.96	799.56	1241.63	2612.97	1037.38	1825.18	-1.33285	2.26e-12	4.94e-10
Slc19a3	36.8738	76.5965	77.1234	21.3125	27.0731	29.0683	63.5312	25.818	44.6746	-1.29537	0.00126063	0.0135992
Slc22a8	326.333	353.695	277.414	76.37	131.756	184.791	319.148	130.972	225.06	-1.28885	7.29e-06	0.000240203
Camkk2	3699.37	6466.77	6199.8	2286.66	1958.29	2486.38	5455.31	2243.78	3849.54	-1.28163	1.24e-10	1.92e-08
Cd6	41.4831	63.0794	42.5905	13.3203	26.1707	21.8012	49.051	20.4308	34.7409	-1.26343	0.00202111	0.0194718
Dnah5	142.886	121.653	148.491	33.7449	59.5609	79.9379	137.677	57.7479	97.7124	-1.25998	7.7e-05	0.00157898
Cyp26b1	173.307	207.261	217.557	50.6173	72.195	130.807	199.375	84.5399	141.957	-1.2425	0.000150516	0.00267792
Mfge8	2382.05	2827.31	2403.49	821.421	786.023	1618.48	2537.62	1075.31	1806.46	-1.23941	4.1e-07	2.3e-05
Rxfp1	735.633	367.212	311.947	145.636	212.073	245.004	471.597	200.904	336.251	-1.23386	0.000112039	0.00213762
Vxn	6074.04	11784.6	8851.92	4154.17	2470.88	4859.6	8903.52	3828.22	6365.87	-1.21771	0.00125811	0.0135903
Pltp	531.905	761.459	721.737	291.271	185	391.384	671.7	289.219	480.459	-1.21664	1.49e-06	6.51e-05
Camk4	745.773	1023.91	1244.33	447.564	378.122	490.009	1004.67	438.565	721.619	-1.19541	4.65e-10	6.22e-08
Cacng3	1848.3	2894.9	2644.07	840.958	786.926	1613.29	2462.42	1080.39	1771.41	-1.1887	0.00302539	0.0263632
Kirrel2	169.62	145.308	119.714	38.185	87.5365	66.4419	144.881	64.0545	104.467	-1.18037	0.00025275	0.00405491
Kcnh4	150.261	305.259	385.617	126.987	78.5121	166.105	280.379	123.868	202.124	-1.17848	0.00117594	0.0129887
Rspo2	428.658	479.854	341.875	214.014	101.073	238.776	416.796	184.621	300.708	-1.17656	4.78e-05	0.00108562
Gucy2g	157.636	331.167	174.967	50.6173	74.9024	169.219	221.256	98.2463	159.751	-1.17406	0.00713324	0.0495425
Tmem121b	920.924	1511.65	1543.62	571.887	422.341	771.349	1325.4	588.525	956.962	-1.17149	1.37e-06	6.14e-05
Shc3	593.669	776.102	848.357	312.584	250.878	425.643	739.376	329.702	534.539	-1.16602	3.09e-08	2.45e-06
Ppp1r3g	125.371	104.757	117.412	31.0808	83.9267	40.488	115.847	51.8319	83.8392	-1.15895	0.00190071	0.0185769
Stx1a	3428.34	5442.86	4331.57	1943.88	1364.49	2644.18	4400.92	1984.18	3192.55	-1.14942	7.83e-07	3.93e-05
Cyp11a1	65.451	75.4701	69.0657	34.6329	38.8048	21.8012	69.9956	31.7463	50.871	-1.13147	0.000451114	0.0063584
Vip	727.336	904.514	636.556	347.217	231.927	466.131	756.135	348.425	552.28	-1.11926	2.61e-06	0.000103322
Ddit4l	490.422	424.66	364.897	180.269	160.634	252.272	426.66	197.725	312.192	-1.11393	5e-08	3.7e-06
Alpl	154.87	146.434	158.851	79.034	43.317	91.3576	153.385	71.2362	112.311	-1.11047	0.000110156	0.00210886
Fmnl1	1789.3	2132.31	3240.33	1099.37	1017.95	1212.56	2387.32	1109.96	1748.64	-1.10464	3.39e-08	2.65e-06
Ugt8a	1171.67	844.814	1106.2	361.425	534.243	563.718	1040.89	486.462	763.678	-1.09879	9.05e-09	8.51e-07
Camk1g	679.4	900.009	964.618	522.157	293.292	371.659	848.009	395.703	621.856	-1.09846	4.36e-07	2.43e-05
Nxph3	604.731	630.794	559.432	183.821	232.829	427.72	598.319	281.456	439.888	-1.09051	4.83e-05	0.00109493
Cx3cl1	11272.3	16241.8	16754.2	5061.73	7397.28	8459.92	14756.1	6972.98	10864.5	-1.08149	1.18e-07	7.73e-06
Adra1d	260.882	319.903	318.853	117.219	204.853	104.854	299.88	142.309	221.094	-1.07223	4.21e-05	0.000993279
Dusp6	713.509	1248.07	1563.19	440.459	520.707	719.441	1174.92	560.202	867.563	-1.06852	6.28e-05	0.00134034
Gm13306	103.247	157.699	117.412	67.4897	71.2926	41.5262	126.119	60.1028	93.1109	-1.0619	0.000355363	0.00532185
Mlip	703.368	931.548	598.57	283.279	351.951	436.025	744.495	357.085	550.79	-1.06128	2.53e-07	1.52e-05
Nog	108.778	150.94	131.225	53.2814	49.6341	85.1287	130.314	62.6814	96.4978	-1.05978	0.000218997	0.00359227
Unc13a	6302.66	10011.6	9843.02	4417.91	3533.95	4631.21	8719.1	4194.36	6456.73	-1.05566	1.07e-08	9.78e-07
Lamp5	2627.26	4097.91	4057.61	1973.19	1580.17	1660.01	3594.26	1737.79	2666.02	-1.048	3.43e-09	3.66e-07
Ryr1	278.397	617.277	817.278	277.063	250.878	300.027	570.984	275.989	423.487	-1.04773	0.000821022	0.0099487
Mical2	6978.37	9923.75	9395.24	4226.99	4137.68	4364.4	8765.79	4243.02	6504.41	-1.04665	1.96e-14	5.94e-12
Grm3	875.753	1246.95	1085.48	439.571	416.024	699.716	1069.39	518.437	793.916	-1.04542	8.77e-07	4.3e-05
Otof	357.676	479.854	590.512	206.021	203.951	282.378	476.014	230.783	353.399	-1.04461	1.68e-06	7.17e-05
Fxyd7	684.01	678.104	566.339	294.824	338.414	302.103	642.818	311.78	477.299	-1.04452	1.25e-15	4.74e-13
Exph5	260.882	323.282	324.609	146.524	111.902	182.715	302.924	147.047	224.986	-1.04428	8.72e-07	4.3e-05
Col11a2	335.552	309.765	382.164	139.42	172.366	191.02	342.494	167.602	255.048	-1.03319	3.24e-09	3.51e-07
Slco1c1	789.1	1116.28	1277.72	315.248	583.877	658.19	1061.03	519.105	790.069	-1.03162	7.42e-05	0.00153767
Abca9	245.211	192.618	222.161	90.5783	111	122.502	219.997	108.027	164.012	-1.03096	2.43e-07	1.48e-05
Tyro3	3167.46	5540.85	5554.04	2279.55	1727.27	2983.66	4754.12	2330.16	3542.14	-1.02876	1.59e-05	0.000449353
Fam81a	3864.38	5608.44	4842.66	2257.35	1767.88	3001.3	4771.82	2342.18	3557	-1.02683	2.36e-07	1.45e-05
Gm45844	98.6375	84.4814	79.4256	39.961	48.7316	40.488	87.5148	43.0602	65.2875	-1.02517	0.00013212	0.0024291
Lhx2	746.695	805.389	801.162	303.704	448.512	404.88	784.416	385.699	585.057	-1.02445	2.71e-11	4.9e-09
Gdf10	78.3569	91.2399	86.3322	40.8491	43.317	41.5262	85.3097	41.8974	63.6035	-1.02344	8.32e-05	0.00167056
Podn	117.996	120.527	156.549	87.9143	37	70.5945	131.691	65.1696	98.4301	-1.01417	0.00222202	0.0209323
Myh7	360.442	332.294	339.573	174.941	137.171	200.364	344.103	170.825	257.464	-1.01384	4.65e-09	4.73e-07
Cdk5r2	3100.17	4653.24	4310.85	1620.64	1737.19	2650.41	4021.42	2002.75	3012.08	-1.00589	1.34e-06	6.01e-05
Card19	92.1846	51.8153	94.3898	187.373	182.292	107.968	79.4632	159.211	119.337	1.00233	0.00158504	0.0162395
Sh2b2	129.98	90.1135	92.0876	241.542	243.658	142.227	104.06	209.143	156.602	1.00471	0.00025016	0.0040177
Spidr	69.1384	49.5624	61.0081	102.123	105.585	155.723	59.903	121.144	90.5233	1.00876	0.00032089	0.00489943
Alox5ap	58.9981	52.9417	43.7416	78.146	109.195	127.693	51.8938	105.011	78.4526	1.00974	0.000532704	0.00722823	84 -
Pgf	77.435	37.1718	65.6124	173.164	97.4633	93.4339	60.0731	121.354	90.7135	1.01151	0.00571855	0.0421821
Ccdc9b	203.728	165.584	120.865	365.865	285.17	341.553	163.392	330.863	247.128	1.01296	2.38e-06	9.54e-05
Serpinh1	285.772	245.559	394.826	523.045	377.219	970.674	308.719	623.646	466.183	1.01405	0.0012	0.0131566
Zc3hav1	141.042	83.355	86.3322	194.477	177.78	259.539	103.577	210.599	157.088	1.01568	0.000161385	0.00283063
Ecm1	94.9501	110.389	148.491	227.334	158.829	329.095	117.943	238.419	178.181	1.01656	0.000629949	0.00818769
Vasp	198.197	155.446	199.14	387.178	314.951	418.376	184.261	373.502	278.881	1.01692	9.29e-09	8.68e-07
Il1r1	236.914	91.2399	96.692	386.29	209.366	267.844	141.615	287.833	214.724	1.0187	0.00646186	0.0460419
Stc2	70.0603	34.919	36.8351	83.4741	97.4633	110.044	47.2714	96.9939	72.1327	1.02358	0.00242457	0.022303
Cyb5r1	310.662	288.363	255.543	639.376	505.365	596.939	284.856	580.56	432.708	1.02484	1.28e-12	2.88e-10
Ezr	1034.31	1556.71	1398.58	3845.14	1809.39	2466.66	1329.87	2707.06	2018.46	1.02566	0.00444233	0.0349181
Ctsl	1497.08	1375.36	1240.88	3286.57	2094.56	3003.38	1371.11	2794.84	2082.97	1.027	9.81e-10	1.19e-07
Pim1	70.0603	51.8153	57.5548	181.157	96.5609	89.2813	59.8101	122.333	91.0715	1.03122	0.00240329	0.0221347
Spsb1	431.424	270.34	287.774	882.695	745.414	396.575	329.846	674.894	502.37	1.03198	0.000268078	0.00422157
Mdfic	47.936	52.9417	78.2745	112.779	80.317	173.372	59.7174	122.156	90.9366	1.03395	0.00329896	0.0279893
Efna1	118.918	57.4474	58.7059	203.357	182.292	97.5865	78.3571	161.079	119.718	1.03485	0.00593018	0.0430861
Stxbp3	454.47	343.558	338.422	794.78	1054.95	485.856	378.817	778.529	578.673	1.03877	4.37e-05	0.00102407
Plekhg2	107.856	101.378	116.261	300.152	157.024	211.784	108.498	222.986	165.742	1.04008	7.57e-05	0.00155818
Tnni1	83.888	54.0681	66.7635	195.365	107.39	119.388	68.2399	140.714	104.477	1.04092	0.000875974	0.0104526
Stab1	265.492	282.731	285.472	491.077	327.585	898.004	277.898	572.222	425.06	1.04125	0.000586538	0.00775232
Sgms2	81.1224	67.5851	55.2526	196.253	142.585	82.0142	67.9867	140.284	104.135	1.04415	0.00254238	0.0231406
Map3k8	49.7797	27.034	44.8927	105.675	82.1219	64.3656	40.5688	84.0541	62.3114	1.04782	0.00229612	0.0214656
Csf1	457.235	379.603	382.164	938.64	597.414	988.323	406.334	841.459	623.897	1.04863	9.07e-08	6.3e-06
Nqo1	55.3107	48.436	47.1949	131.427	83.9267	97.5865	50.3139	104.314	77.3137	1.04967	0.00019887	0.00333202
Slc22a4	185.291	130.665	128.923	410.267	283.366	230.47	148.293	308.034	228.163	1.05241	4.21e-05	0.000993279
Tex30	32.2646	41.6775	28.7774	90.5783	69.4877	52.9459	34.2398	71.004	52.6219	1.05692	0.00197378	0.01914
Rhbdf1	160.401	159.951	191.082	456.444	304.122	302.103	170.478	354.223	262.35	1.05744	4.76e-07	2.6e-05
Trip10	157.636	129.538	94.3898	380.962	276.146	139.113	127.188	265.407	196.297	1.06042	0.00234138	0.0217498
Asap3	126.293	65.3323	95.5409	212.237	184.097	206.593	95.722	200.976	148.349	1.06323	2.74e-05	0.000698327
Spi1	46.0923	66.4587	59.857	109.227	64.9755	186.868	57.4693	120.357	88.913	1.0666	0.00689546	0.0483358
Pglyrp1	96.7938	46.1832	93.2387	225.558	167.853	101.739	78.7386	165.05	121.894	1.06696	0.00368532	0.03045
Ace	481.203	215.146	262.45	845.398	604.633	568.909	319.6	672.98	496.29	1.0718	0.000135185	0.00246418
Vwf	795.553	412.269	454.683	1070.96	884.389	1545.81	554.168	1167.05	860.61	1.07252	5.33e-05	0.00117214
Nfkbiz	111.543	100.251	127.772	324.128	196.731	193.097	113.189	237.986	175.587	1.07406	2.67e-05	0.000681545
Dysf	75.5913	140.802	92.0876	277.063	148.902	222.165	102.827	216.043	159.435	1.07456	0.000475802	0.00661845
Lyn	114.309	136.297	150.794	222.006	159.732	464.055	133.8	281.931	207.865	1.0748	0.00251563	0.0229559
Cebpa	121.684	90.1135	97.8431	251.31	205.756	197.249	103.213	218.105	160.659	1.07527	1.9e-07	1.19e-05
Pla2g4a	72.8258	66.4587	58.7059	142.972	93.8535	182.715	65.9968	139.847	102.922	1.07842	0.000287153	0.00448104
Ldlrap1	92.1846	68.7115	85.1811	210.461	146.195	164.028	82.0257	173.562	127.794	1.07878	5.16e-06	0.000184298
Cfh	684.01	492.245	461.589	1518.52	723.755	1225.02	545.948	1155.77	850.857	1.08092	1.75e-05	0.000480232
Frrs1	27.6554	37.1718	26.4752	62.1616	44.2195	87.205	30.4341	64.5287	47.4814	1.08262	0.00393383	0.031848
Rad51	19.3588	15.7699	19.5686	37.297	42.4146	36.3354	18.2324	38.6823	28.4574	1.08377	0.00442902	0.0348688
Nek6	580.763	519.279	469.647	1342.69	917.779	1071.38	523.23	1110.62	816.922	1.08482	1.39e-11	2.71e-09
Lrrc8a	283.007	157.699	164.607	557.678	389.853	340.515	201.771	429.349	315.56	1.08628	5.41e-05	0.00118813
Pstpip1	32.2646	34.919	19.5686	61.2736	76.7072	46.717	28.9174	61.5659	45.2417	1.08823	0.00325681	0.0277108
Anxa4	65.451	70.9644	61.0081	153.628	111.902	154.685	65.8078	140.072	102.94	1.08857	5.91e-06	0.00020566
Fcer1g	91.2627	114.895	80.5767	202.469	125.439	286.531	95.578	204.813	150.195	1.09806	0.00049059	0.00677816
Lat2	35.952	32.6661	63.3103	76.37	72.195	133.922	43.9761	94.1623	69.0692	1.10005	0.00412538	0.03311
Slc7a7	23.0461	16.8963	33.3818	48.8413	42.4146	66.4419	24.4414	52.5659	38.5037	1.10468	0.00500566	0.0379996
Wfikkn2	48.8578	20.2755	29.9285	71.0418	90.2438	53.984	33.0206	71.7566	52.3886	1.10998	0.00535062	0.0400649
Fcgr3	223.087	226.41	195.686	404.938	370	628.083	215.061	467.674	341.367	1.11861	2.65e-07	1.57e-05
Abcb1b	88.4972	55.1945	61.0081	182.933	128.146	135.998	68.2333	149.026	108.629	1.12032	4.42e-05	0.00103153
Tpm4	745.773	560.957	574.397	1659.71	960.194	1493.9	627.042	1371.27	999.157	1.12776	3.9e-08	2.98e-06
Mctp2	42.4049	49.5624	36.8351	115.443	89.3414	76.8234	42.9341	93.8693	68.4017	1.13101	0.000112	0.00213762
Psmb8	50.7015	32.6661	48.346	98.5705	67.6828	123.54	43.9046	96.5979	70.2512	1.13132	0.000685782	0.00865589
Slc41a3	107.856	90.1135	52.9504	245.982	203.049	101.739	83.6399	183.59	133.615	1.13218	0.00221446	0.0208876
S100a10	300.522	345.811	326.911	935.976	569.438	632.236	324.414	712.55	518.482	1.13646	6.08e-09	5.91e-07
Bub1b	30.4209	66.4587	56.4037	126.987	144.39	64.3656	51.0944	111.914	81.5044	1.14025	0.00431498	0.034225
Anxa3	190.822	191.491	224.464	478.644	253.585	606.282	202.259	446.171	324.215	1.14105	5.19e-05	0.00116057
Wwtr1	245.211	299.627	364.897	795.668	579.365	628.083	303.245	667.706	485.475	1.14181	6.7e-10	8.73e-08
Gpsm3	26.7335	15.7699	27.6263	33.7449	57.756	64.3656	23.3766	51.9555	37.666	1.14529	0.00597147	0.0432734
Cd9	585.372	511.394	603.174	1482.11	924.096	1356.87	566.647	1254.36	910.502	1.14609	1.2e-10	1.87e-08
Lsp1	44.2486	117.148	119.714	268.183	156.122	196.211	93.7034	206.839	150.271	1.14848	0.00187506	0.0184202
Slc16a3	58.9981	57.4474	50.6482	176.717	98.3657	96.5484	55.6979	123.877	89.7874	1.1537	0.000268543	0.00422166
Nt5dc2	83.888	70.9644	52.9504	231.774	129.951	102.777	69.2676	154.834	112.051	1.15873	0.000890908	0.0105579
F13a1	84.8098	54.0681	42.5905	145.636	86.634	175.448	60.4895	135.906	98.1977	1.15899	0.00121137	0.013239
Cnn3	1309.02	1093.75	1190.23	3092.98	2396.88	2542.44	1197.67	2677.43	1937.55	1.16011	6.02e-20	4.96e-17
Ehd2	155.792	135.17	134.678	273.511	233.731	449.521	141.88	318.921	230.401	1.1652	6.67e-06	0.000226151
Fbln5	164.089	82.2286	97.8431	377.41	148	250.195	114.72	258.535	186.627	1.16855	0.00134723	0.0143013
Slfn8	23.968	27.034	11.511	53.2814	36.0975	51.9077	20.8377	47.0955	33.9666	1.16866	0.00575664	0.0423676
Eif2ak2	111.543	110.389	90.9365	277.951	171.463	255.386	104.29	234.933	169.612	1.1693	7.81e-07	3.93e-05
Ptprc	59.92	68.7115	79.4256	117.219	79.4145	271.996	69.3524	156.21	112.781	1.17054	0.00589347	0.0428973
Nckap1l	226.774	272.593	250.939	634.048	278.853	776.54	250.102	563.147	406.625	1.1709	0.000143597	0.00258563
Cchcr1	96.7938	61.953	77.1234	203.357	111	219.051	78.6234	177.803	128.213	1.17208	0.000173789	0.00300909
Hcls1	92.1846	110.389	92.0876	225.558	112.805	327.019	98.2204	221.794	160.007	1.17409	0.000814456	0.00987719
Amotl1	920.002	645.438	816.127	1684.58	2294	1397.36	793.856	1791.98	1292.92	1.1742	1.96e-09	2.15e-07
Srp54a	20.2806	19.1491	34.5329	73.7059	41.5121	50.8696	24.6542	55.3625	40.0084	1.17524	0.00396497	0.0319946
Cdh5	280.241	304.133	300.436	959.065	382.634	657.152	294.937	666.283	480.61	1.17615	1.95e-05	0.000523585
Srxn1	2078.76	2034.31	1817.58	4451.66	4028.48	4959.26	1976.88	4479.8	3228.34	1.17966	1.17e-27	2.17e-24
Slc39a14	658.198	646.564	787.349	2241.37	1408.71	1087.99	697.37	1579.35	1138.36	1.17998	3.48e-07	1.99e-05
Cp	397.315	238.801	326.911	967.945	499.048	730.861	321.009	732.618	526.814	1.18899	2.75e-06	0.000107897
Irf1	94.9501	81.1021	86.3322	258.415	180.488	160.914	87.4615	199.939	143.7	1.19257	9.73e-07	4.69e-05
Mrps6	229.54	197.123	258.996	494.629	531.536	541.917	228.553	522.694	375.623	1.19332	1.2e-17	6.37e-15
Odc1	1240.8	1164.72	1153.4	3972.13	1702.9	2486.38	1186.31	2720.47	1953.39	1.19736	1.09e-06	5.13e-05
Kif18a	21.2025	16.8963	13.8131	51.5053	37.9024	30.1065	17.304	39.8381	28.571	1.19737	0.00477081	0.036761
Gem	32.2646	20.2755	74.8212	99.4586	102.878	89.2813	42.4538	97.2059	69.8299	1.201	0.0056465	0.0418167
Ecscr	69.1384	46.1832	44.8927	110.115	75.8048	184.791	53.4048	123.57	88.4876	1.20214	0.00141283	0.0148227
Tead1	365.051	298.501	432.812	1197.05	699.389	631.198	365.455	842.547	604.001	1.20575	8.07e-07	4.03e-05
Dll4	49.7797	33.7926	48.346	125.211	88.4389	91.3576	43.9727	101.669	72.821	1.2067	4.16e-05	0.000988943
Hspb8	365.051	192.618	248.637	724.627	486.414	657.152	268.768	622.731	445.75	1.20901	5.05e-07	2.74e-05
Glis3	124.449	127.285	79.4256	340.113	221.097	207.631	110.387	256.28	183.334	1.21371	7e-06	0.000234344
Ppp1r15a	310.662	277.099	272.81	734.395	567.633	700.754	286.857	667.594	477.226	1.21643	2.04e-17	1.04e-14
Apbb1ip	77.435	134.044	96.692	155.404	126.341	436.025	102.724	239.257	170.99	1.21969	0.00520061	0.0391985
Hmga1b	64.5292	64.2059	40.2883	143.86	127.244	124.579	56.3411	131.894	94.1176	1.22198	2.03e-06	8.37e-05
Slc26a10	47.0141	38.2982	77.1234	165.172	147.097	65.4037	54.1453	125.891	90.0182	1.22227	0.00268626	0.0241715
Col4a1	917.236	1157.96	1111.96	2843.45	1602.73	2991.96	1062.38	2479.38	1770.88	1.22291	1.32e-08	1.19e-06
Rbm3	843.489	829.044	957.711	2553.07	1780.51	1818.85	876.748	2050.81	1463.78	1.22652	3.74e-15	1.26e-12
Asb2	36.8738	42.8039	32.2307	80.8101	122.732	58.1367	37.3028	87.2261	62.2645	1.22823	0.000640077	0.00826912
Itgb2	81.1224	114.895	124.318	261.967	187.707	300.027	106.778	249.9	178.339	1.23058	8.77e-07	4.3e-05
Mfsd2b	23.968	28.1605	24.173	87.0262	61.3658	30.1065	25.4338	59.4995	42.4667	1.23196	0.00579882	0.0425629
Dmkn	17.5151	25.9076	32.2307	76.37	37	63.3274	25.2178	58.8991	42.0585	1.23313	0.00321046	0.0274264
Slc2a9	21.2025	19.1491	14.9642	30.1928	55.9512	44.6406	18.4386	43.5949	31.0167	1.2342	0.0032662	0.027759
Nt5e	104.169	107.01	93.2387	349.881	120.927	246.043	101.472	238.95	170.211	1.23529	0.000358484	0.0053524
Mgst1	123.527	83.355	86.3322	266.407	127.244	298.988	97.7382	230.88	164.309	1.2357	0.000192424	0.00325216
Shmt1	27.6554	15.7699	17.2664	45.2892	45.1219	55.0222	20.2306	48.4778	34.3542	1.24324	0.00121197	0.013239
Itga2b	31.3428	36.0454	27.6263	97.6825	67.6828	59.1748	31.6715	74.8467	53.2591	1.24357	0.000214563	0.00355262
Cebpb	59.92	48.436	40.2883	168.724	111	73.709	49.5481	117.811	83.6796	1.24759	0.000485554	0.00672153
Fas	77.435	28.1605	43.7416	165.172	92.9511	98.6247	49.779	118.916	84.3475	1.24834	0.0020864	0.0200101
Tgfb1	90.3409	88.9871	94.3898	326.792	108.293	218.012	91.2393	217.699	154.469	1.25494	0.000458708	0.00643124
Klc3	35.0301	21.402	20.7197	67.4897	61.3658	57.0985	25.7173	61.9847	43.851	1.25553	0.000309589	0.00475129
Tma16	309.74	235.422	252.09	808.989	731.877	365.43	265.751	635.432	450.591	1.25738	2.85e-06	0.000111223
Vav1	62.6855	97.9984	80.5767	145.636	121.829	310.408	80.4202	192.624	136.522	1.26053	0.000672473	0.00852546
Slc1a5	38.7175	46.1832	32.2307	123.435	64.9755	92.3957	39.0438	93.6022	66.323	1.26157	0.000196484	0.00330199
Acer2	395.472	168.963	203.744	673.121	730.975	442.254	256.06	615.45	435.755	1.26242	3.32e-05	0.000816386
Ly86	77.435	97.9984	86.3322	133.203	102.878	395.537	87.2552	210.539	148.897	1.26961	0.00466658	0.0362019
Rasip1	137.355	119.4	86.3322	419.147	199.439	210.745	114.363	276.444	195.403	1.27175	7.22e-05	0.00150451
Ncf4	17.5151	12.3906	24.173	57.7215	30.6829	42.5643	18.0262	43.6562	30.8412	1.27914	0.00393658	0.0318528
Fhad1	124.449	214.02	151.945	584.319	383.536	225.28	163.471	397.712	280.591	1.28547	9.42e-05	0.00185794
Tmbim1	666.494	526.038	519.144	1768.94	1511.58	907.347	570.559	1395.96	983.258	1.29046	8.74e-09	8.27e-07
Plce1	427.736	212.893	257.845	1007.91	628.097	567.871	299.492	734.624	517.058	1.29241	4.63e-06	0.000167909
Cd163	41.4831	20.2755	21.8708	87.9143	55.0487	64.3656	27.8765	69.1095	48.493	1.2961	0.00102999	0.0117705
C1ra	20.2806	27.034	49.4971	89.6903	92.0487	53.984	32.2706	78.5743	55.4225	1.29656	0.00158813	0.0162508
Aff1	446.173	358.201	390.221	1398.64	808.584	733.975	398.199	980.399	689.299	1.29963	2.27e-08	1.93e-06
Prorsd1	26.7335	14.6434	21.8708	56.8335	53.2438	46.717	21.0826	52.2648	36.6737	1.30052	0.000434414	0.00622338
P4ha3	68.2166	63.0794	56.4037	220.23	89.3414	153.647	62.5666	154.406	108.486	1.30174	0.000145892	0.00261235
Ifit3	177.916	149.814	72.519	459.996	187.707	347.782	133.416	331.828	232.622	1.31166	0.000398583	0.00581665
Tead3	48.8578	29.2869	52.9504	140.308	112.805	72.6708	43.6984	108.594	76.1464	1.31373	0.000193827	0.00326473
Ampd3	494.109	482.107	462.74	1555.82	832.048	1204.26	479.652	1197.37	838.513	1.31963	8.5e-11	1.37e-08
Igsf10	137.355	81.1021	52.9504	235.326	245.463	202.44	90.4692	227.743	159.106	1.32416	2.57e-05	0.000659196
Trpv4	27.6554	21.402	16.1153	81.6981	31.5853	50.8696	21.7242	54.7177	38.2209	1.3256	0.00417255	0.0333984
Irgm1	160.401	173.468	160.002	581.655	283.366	373.736	164.624	412.919	288.771	1.32744	2.11e-07	1.32e-05
B3gnt3	35.952	38.2982	18.4175	82.5861	48.7316	102.777	30.8892	78.0317	54.4605	1.32952	0.00122852	0.013355
Gpr182	51.6234	22.5284	14.9642	87.0262	71.2926	68.5182	29.7053	75.6123	52.6588	1.33169	0.00289642	0.025567
Ltbr	124.449	84.4814	84.03	277.063	162.439	304.179	97.6535	247.894	172.774	1.33828	3.15e-06	0.000120371
Igfbp7	437.877	296.248	296.983	882.695	594.707	1136.78	343.702	871.393	607.548	1.3397	3.35e-08	2.64e-06
Hspg2	121.684	129.538	196.837	450.228	216.585	470.284	149.353	379.032	264.193	1.34511	1.34e-05	0.000393494
Palld	99.5593	58.5738	80.5767	252.198	194.024	161.952	79.5699	202.725	141.147	1.34522	5.81e-07	3.07e-05
Oip5	11.0621	13.517	12.6621	39.073	18.0488	37.3736	12.4137	31.4984	21.9561	1.34557	0.00709948	0.0493311
Rhoc	190.822	215.146	193.384	741.499	304.122	481.704	199.784	509.108	354.446	1.35011	1.66e-06	7.11e-05
Cd63	856.395	672.472	615.836	2022.92	1359.97	2089.8	714.901	1824.23	1269.57	1.35014	6.16e-13	1.43e-10
Bcl6b	39.6394	27.034	54.1015	154.516	84.8292	70.5945	40.2583	103.313	71.7858	1.36296	0.00064185	0.0082772
Arhgap11a	76.5132	66.4587	75.9723	279.727	138.975	144.303	72.9814	187.669	130.325	1.36327	1.53e-05	0.000437688
Fermt3	47.0141	59.7002	73.6701	114.555	90.2438	259.539	60.1281	154.779	107.454	1.36472	0.000866657	0.0103915
Sdc4	1576.36	773.85	659.578	3261.71	2400.48	2107.45	1003.26	2589.88	1796.57	1.36778	0.00154747	0.015987
Mapkapk3	46.0923	43.9303	46.0438	144.748	88.4389	118.35	45.3555	117.179	81.2671	1.36904	1.48e-06	6.49e-05
Cd86	35.0301	38.2982	37.9862	103.011	53.2438	131.846	37.1048	96.0334	66.5691	1.37071	0.000303028	0.0046699
Nfam1	45.1704	63.0794	81.7278	89.6903	245.463	155.723	63.3259	163.626	113.476	1.37396	0.000403887	0.00587674
Ptprh	38.7175	32.6661	34.5329	150.964	84.8292	39.4499	35.3055	91.7476	63.5266	1.37917	0.00316831	0.0272702
Tcaf2	19.3588	11.2642	6.90657	41.7371	25.2683	32.1828	12.5098	33.0627	22.7863	1.3808	0.00673288	0.0474658
B4galt1	114.309	112.642	78.2745	302.816	213.878	284.454	101.742	267.049	184.396	1.38818	8.62e-10	1.06e-07
Trat1	7.37477	7.88493	12.6621	21.3125	23.4634	28.0302	9.30725	24.2687	16.788	1.39185	0.00631086	0.0452263
Ptpn6	55.3107	77.7229	82.8789	171.388	153.414	240.852	71.9708	188.552	130.261	1.39354	1.83e-07	1.16e-05
Col18a1	96.7938	68.7115	81.7278	311.696	155.219	184.791	82.411	217.236	149.823	1.39628	3.88e-06	0.000144145
Tnni3	11.984	7.88493	14.9642	28.4167	26.1707	37.3736	11.6111	30.6537	21.1324	1.39685	0.00308091	0.0266885
Casp8	58.9981	49.5624	33.3818	148.3	71.2926	156.761	47.3141	125.451	86.3827	1.40003	0.000176651	0.003048
Myd88	96.7938	88.9871	113.958	276.175	240.951	274.073	99.9131	263.733	181.823	1.40168	6.98e-15	2.25e-12
Mindy4b-ps	24.8898	18.0227	16.1153	33.7449	69.4877	53.984	19.676	52.4055	36.0407	1.4028	0.00100777	0.0116238
Ier3	111.543	69.838	132.376	410.267	210.268	210.745	104.586	277.093	190.84	1.40619	1.89e-05	0.000511783
Plb1	39.6394	27.034	13.8131	73.7059	82.1219	60.213	26.8289	72.0136	49.4212	1.41068	0.000432524	0.00620229
Apobec3	69.1384	55.1945	57.5548	153.628	124.536	208.669	60.6292	162.278	111.454	1.41379	1.83e-07	1.16e-05
Kcne4	29.4991	19.1491	26.4752	70.1538	84.8292	45.6788	25.0411	66.8873	45.9642	1.41505	0.000186464	0.00317309
Tlr7	58.0763	63.0794	50.6482	130.539	91.1462	239.814	57.268	153.833	105.551	1.42243	0.000110089	0.00210886
Ifi203	12.9058	11.2642	12.6621	32.8568	23.4634	43.6025	12.2774	33.3076	22.7925	1.43301	0.00214638	0.0204533
Anxa1	43.3267	31.5397	27.6263	129.651	48.7316	99.6628	34.1643	92.6819	63.4231	1.43334	0.000564751	0.00754492
Ggta1	70.9821	99.1248	107.052	232.662	148	367.507	92.3863	249.39	170.888	1.43422	1.73e-05	0.000476713
Tmem154	11.984	13.517	9.20876	46.1772	20.7561	26.992	11.5699	31.3084	21.4392	1.43631	0.00532364	0.0399008
S1pr3	196.353	198.25	195.686	767.252	309.536	524.268	196.763	533.685	365.224	1.43968	3.22e-07	1.85e-05
Cd53	114.309	121.653	97.8431	293.048	179.585	437.063	111.268	303.232	207.25	1.44436	2.33e-06	9.41e-05
Sox7	33.1864	20.2755	46.0438	95.0184	69.4877	106.93	33.1686	90.4787	61.8236	1.44749	5.9e-05	0.00127677
Rasl11a	23.0461	40.5511	48.346	141.196	83.0243	78.8997	37.3144	101.04	69.1771	1.44878	0.000142549	0.00257943
Apobec1	36.8738	37.1718	25.3241	77.258	52.3414	143.265	33.1232	90.9549	62.0391	1.45078	0.000652822	0.00838231
Stat3	979	927.043	1026.78	3466.84	1829.24	2735.54	977.607	2677.21	1827.41	1.45343	4.48e-13	1.09e-10
Tspo	23.968	15.7699	26.4752	66.6017	29.7805	86.1668	22.071	60.8497	41.4603	1.45849	0.00205888	0.0197716
Edn1	44.2486	52.9417	33.3818	162.508	47.8292	150.532	43.524	120.29	81.907	1.46515	0.00118416	0.0130407
Slfn2	63.6074	30.4133	49.4971	158.068	56.8536	183.753	47.8393	132.892	90.3655	1.46837	0.00117422	0.0129793
Serping1	131.824	91.2399	89.7854	400.498	130.854	339.477	104.283	290.276	197.28	1.47406	7.71e-05	0.00157898
Stc1	80.2006	61.953	59.857	341.889	98.3657	121.464	67.3369	187.24	127.288	1.4745	0.000883583	0.0105107
Il33	1082.25	513.647	521.446	2765.3	1272.44	1852.07	705.78	1963.27	1334.52	1.47551	0.00201886	0.0194628
Tlr4	23.968	13.517	17.2664	47.9532	32.4878	73.709	18.2505	51.3833	34.8169	1.47881	0.00120455	0.0131967
Tgm2	419.44	262.456	244.032	859.606	507.17	1220.87	308.643	862.549	585.596	1.48152	0.000572278	0.00761807
Lcp2	49.7797	59.7002	50.6482	150.076	92.0487	205.555	53.376	149.226	101.301	1.4823	6.98e-06	0.000234344
Mvp	158.557	171.216	123.167	609.184	223.805	440.178	150.98	424.389	287.684	1.49043	3.3e-06	0.000124986
Dach2	17.5151	7.88493	5.75548	28.4167	27.9756	33.2209	10.3852	29.8711	20.1281	1.49288	0.00457931	0.035749
Gins1	15.6714	13.517	13.8131	39.961	27.9756	53.984	14.3338	40.6402	27.487	1.49487	0.00076136	0.00937098
Tap1	55.3107	48.436	29.9285	165.172	73.0975	140.151	44.5584	126.14	85.3493	1.49525	7.82e-05	0.00159988
Msln	20.2806	40.5511	23.0219	84.3622	66.7804	84.0905	27.9512	78.411	53.1811	1.49648	2.32e-05	0.00060287
Ccr5	40.5612	67.5851	70.2168	123.435	100.171	279.264	59.4544	167.623	113.539	1.49746	0.000296591	0.00459933
Arhgap9	7.37477	11.2642	8.05767	21.3125	20.7561	33.2209	8.89887	25.0965	16.9977	1.498	0.00433036	0.0343286
B3gnt5	20.2806	24.7812	29.9285	111.891	28.878	70.5945	24.9968	70.4545	47.7256	1.49958	0.00293334	0.0258009
Upp1	14.7495	39.4247	48.346	108.339	88.4389	90.3194	34.1734	95.699	64.9362	1.50033	0.000207354	0.00345342
Cyba	47.0141	36.0454	43.7416	107.451	78.5121	174.41	42.2671	120.124	81.1957	1.50125	2.19e-05	0.00057453
Hck	34.1083	46.1832	31.0796	99.4586	69.4877	147.418	37.1237	105.455	71.2892	1.50489	3.07e-05	0.000761421
Cd1d1	15.6714	20.2755	19.5686	79.9221	40.6097	36.3354	18.5052	52.2891	35.3971	1.50736	0.000836662	0.0100807
P2ry6	31.3428	24.7812	39.1372	58.6095	69.4877	144.303	31.7537	90.8002	61.277	1.51281	0.000341294	0.00514225
Itprip	23.0461	18.0227	19.5686	71.9299	45.1219	57.0985	20.2125	58.0501	39.1313	1.51651	4.38e-05	0.00102412
Bag3	124.449	87.8607	122.016	391.618	319.463	249.157	111.442	320.079	215.761	1.52127	3.67e-11	6.34e-09
Myc	73.7477	82.2286	48.346	229.11	159.732	199.326	68.1074	196.056	132.082	1.52226	5.3e-09	5.32e-07
Vil1	7.37477	13.517	9.20876	23.9766	37.9024	23.8776	10.0335	28.5855	19.3095	1.52436	0.00283784	0.0251845
Ifitm3	216.634	136.297	123.167	505.285	268.927	602.13	158.699	458.78	308.74	1.52748	8.8e-07	4.3e-05
Slfn9	11.0621	12.3906	16.1153	56.8335	21.6585	35.2973	13.1894	37.9297	25.5596	1.53187	0.0028067	0.0250128
Stra6	139.199	135.17	87.4833	460.884	187.707	399.689	120.617	349.427	235.022	1.53238	2.98e-06	0.000115255
Lama5	163.167	190.365	201.442	800.109	499.951	305.217	184.991	535.092	360.042	1.5343	3.04e-07	1.77e-05
Muc1	18.4369	7.88493	14.9642	63.0496	35.1951	21.8012	13.762	40.0153	26.8887	1.53445	0.00530893	0.0398129
Mmp9	28.5772	14.6434	29.9285	58.6095	33.3902	121.464	24.383	71.1546	47.7688	1.53868	0.0034108	0.0286762
Lcp1	198.197	220.778	225.615	477.756	369.097	1026.73	214.863	624.529	419.696	1.53889	1.65e-06	7.11e-05
Fcgr1	45.1704	61.953	69.0657	102.123	99.2682	312.484	58.7297	171.292	115.011	1.54473	0.000621936	0.00813766
S100a6	58.9981	111.515	89.7854	323.24	168.756	266.806	86.7663	252.934	169.85	1.54856	5.53e-07	2.95e-05
Smim3	180.682	96.872	80.5767	452.892	267.122	332.209	119.377	350.741	235.059	1.54899	8.57e-07	4.25e-05
Ada	31.3428	16.8963	8.05767	70.1538	63.1707	33.2209	18.7656	55.5151	37.1404	1.54995	0.00321232	0.0274266
Dok1	12.9058	16.8963	10.3599	44.4011	29.7805	43.6025	13.3873	39.2614	26.3243	1.55133	0.000390774	0.00571954
H2-Q4	66.3729	61.953	48.346	306.368	82.1219	129.769	58.8906	172.753	115.822	1.55184	0.000481135	0.0066739
Sbno2	368.738	448.315	348.782	1491.88	738.194	1188.69	388.612	1139.59	764.099	1.55234	2.04e-11	3.74e-09
Micall2	49.7797	45.0567	47.1949	206.021	121.829	89.2813	47.3438	139.044	93.1938	1.55555	7.53e-06	0.00024707
Traf3ip2	27.6554	15.7699	11.511	78.146	48.7316	36.3354	18.3121	54.4044	36.3582	1.55787	0.00111674	0.012521
Ip6k3	15.6714	6.75851	13.8131	31.0808	50.5365	25.9539	12.081	35.8571	23.969	1.56179	0.00218841	0.0207559
Sfrp2	29.4991	22.5284	27.6263	135.867	54.1463	45.6788	26.5512	78.5642	52.5577	1.56558	0.000986106	0.0114265
Cdt1	33.1864	29.2869	20.7197	114.555	62.2682	70.5945	27.731	82.4726	55.1018	1.56696	2.8e-05	0.000709172
Apod	4906.06	2188.63	2512.84	9304.7	11183	8016.63	3202.51	9501.45	6351.98	1.56881	0.000131652	0.00242658
Zfp185	40.5612	13.517	24.173	110.115	64.9755	59.1748	26.0837	78.0884	52.0861	1.57054	0.000522874	0.0071404
Gadd45g	106.934	103.631	162.304	531.038	223.805	351.934	124.29	368.926	246.608	1.57174	6.42e-07	3.33e-05
Rac2	46.0923	28.1605	26.4752	94.1304	52.3414	155.723	33.576	100.732	67.1538	1.57469	0.000407957	0.00591857
Ifitm2	64.5292	29.2869	47.1949	170.5	89.3414	164.028	47.0037	141.29	94.1469	1.57966	1.8e-05	0.000489542
Nupr1	113.387	147.561	105.901	384.514	374.512	340.515	122.283	366.513	244.398	1.58631	5.49e-20	4.79e-17
Card9	25.8117	21.402	21.8708	68.3778	58.6585	82.0142	23.0281	69.6835	46.3558	1.58902	1.81e-06	7.52e-05
Il20rb	23.0461	7.88493	6.90657	43.5131	43.317	29.0683	12.6125	38.6328	25.6227	1.58909	0.00341842	0.0286916
Il13ra1	129.058	127.285	149.642	573.663	236.439	412.147	135.329	407.416	271.372	1.59079	5.41e-08	3.98e-06
Loxl1	17.5151	49.5624	44.8927	164.284	39.7073	131.846	37.3234	111.946	74.6346	1.59099	0.00329822	0.0279893
Samsn1	19.3588	21.402	21.8708	69.2658	30.6829	89.2813	20.8772	63.0767	41.9769	1.59429	0.000534083	0.00723276
Plek	278.397	296.248	277.414	787.676	486.414	1301.85	284.02	858.645	571.333	1.59548	2.9e-08	2.33e-06
Slc11a1	27.6554	45.0567	29.9285	114.555	55.0487	140.151	34.2135	103.252	68.7325	1.5955	9.69e-05	0.00189677
Birc3	39.6394	49.5624	62.1592	230.886	85.7316	141.189	50.4536	152.602	101.528	1.60152	3.06e-05	0.000759538
Ahnak2	66.3729	45.0567	37.9862	279.727	104.683	70.5945	49.8053	151.668	100.737	1.60418	0.000999803	0.0115498
Pla2r1	9.21846	4.50567	12.6621	31.0808	15.3414	34.2591	8.79539	26.8938	17.8446	1.60943	0.00594998	0.0431817
Gadd45b	140.121	188.112	230.219	824.085	490.926	393.461	186.151	569.491	377.821	1.6164	1.09e-08	9.96e-07
Smtnl2	12.9058	9.01135	19.5686	67.4897	31.5853	28.0302	13.8286	42.3684	28.0985	1.62245	0.00220189	0.0208219
Syt15	23.968	9.01135	17.2664	47.0652	63.1707	46.717	16.7486	52.3176	34.5331	1.62801	0.000157009	0.00275713
Fignl1	11.984	9.01135	8.05767	25.7527	19.8536	45.6788	9.68434	30.4284	20.0564	1.63463	0.00251898	0.0229723
Prrx2	14.7495	5.63209	11.511	32.8568	27.0731	40.488	10.6309	33.4727	22.0518	1.6351	0.000986821	0.0114265
Mtmr11	133.668	157.699	157.7	479.532	497.243	421.491	149.689	466.089	307.889	1.64375	4.84e-28	1.03e-24
Plekha4	54.3889	22.5284	20.7197	153.628	117.317	36.3354	32.5457	102.427	67.4862	1.64693	0.00302566	0.0263632
Glipr1	11.984	20.2755	9.20876	47.9532	16.2439	66.4419	13.8228	43.5463	28.6845	1.65458	0.00554517	0.0411661
Greb1	22.1243	25.9076	27.6263	78.146	120.024	39.4499	25.2194	79.2067	52.2131	1.65762	0.000208085	0.00346172
Naip2	23.968	13.517	26.4752	73.7059	53.2438	75.7853	21.3201	67.5783	44.4492	1.65915	8.99e-06	0.000283429
Jsrp1	23.968	46.1832	62.1592	259.303	89.3414	67.48	44.1034	138.708	91.4057	1.66002	0.00166555	0.0168208
Alox5	17.5151	20.2755	8.05767	44.4011	57.756	43.6025	15.2828	48.5866	31.9347	1.66154	0.000112234	0.00213762
Kcnj5	35.952	7.88493	26.4752	105.675	88.4389	30.1065	23.4374	74.74	49.0887	1.66727	0.0047927	0.0368597
C1qtnf1	79.2787	40.5511	39.1372	285.943	93.8535	128.731	52.989	169.509	111.249	1.67208	0.000207	0.00345139
Ptges	94.9501	107.01	64.4613	497.293	153.414	199.326	88.8071	283.344	186.076	1.67365	4.73e-05	0.00107721
Nlrp3	12.9058	14.6434	17.2664	59.4975	31.5853	51.9077	14.9386	47.6635	31.301	1.67959	0.000107278	0.00206619
Cd68	114.309	126.159	132.376	310.808	265.317	620.816	124.281	398.98	261.631	1.68223	3.77e-08	2.91e-06
Lyve1	28.5772	21.402	26.4752	168.724	27.9756	48.7933	25.4848	81.8311	53.6579	1.68303	0.00570732	0.0421202
Gpnmb	52.5452	43.9303	42.5905	85.2502	131.756	231.508	46.3554	149.505	97.9301	1.68394	9.41e-06	0.000293545
Pdpn	156.714	171.216	160.002	645.593	222	712.174	162.644	526.589	344.616	1.69472	1.21e-06	5.54e-05
Adamts14	6.45292	7.88493	10.3599	31.9688	31.5853	15.5723	8.23257	26.3755	17.304	1.69706	0.00231324	0.0215613
Adora3	2.76554	12.3906	10.3599	18.6485	23.4634	39.4499	8.50533	27.1872	17.8463	1.69747	0.00691984	0.0484226
1700010I14Rik	6.45292	15.7699	12.6621	28.4167	27.0731	57.0985	11.6283	37.5295	24.5789	1.70154	0.00162257	0.0164767
Dab2	299.6	208.387	254.392	892.463	393.463	1213.6	254.126	833.176	543.651	1.71244	0.000342519	0.00515548
Hk2	67.2947	78.8493	57.5548	278.839	174.171	215.936	67.8996	222.982	145.441	1.71564	9.69e-12	1.92e-09
Rnf125	20.2806	20.2755	28.7774	134.091	37	56.0603	23.1112	75.7173	49.4142	1.71687	0.000845534	0.0101711
Nfkb2	47.0141	43.9303	58.7059	238.878	109.195	146.38	49.8834	164.818	107.351	1.72685	2.83e-07	1.66e-05
B3gnt7	19.3588	9.01135	8.05767	75.4819	22.5609	23.8776	12.1426	40.6401	26.3914	1.73013	0.00684457	0.0480783
Ucp2	447.095	404.384	249.788	1705	859.121	1097.33	367.089	1220.48	793.787	1.73209	8.29e-11	1.35e-08
Clec5a	19.3588	16.8963	26.4752	86.1382	42.4146	79.9379	20.9101	69.4969	45.2035	1.73521	2.46e-05	0.00063354
1810020O05Rik	35.952	32.6661	59.857	254.863	93.8535	77.8616	42.825	142.193	92.5088	1.73572	0.000262087	0.00415092
Pros1	252.586	182.48	219.859	997.25	457.536	728.784	218.308	727.857	473.082	1.73597	2.89e-11	5.12e-09
Pkd1l2	4.60923	9.01135	5.75548	16.8724	25.2683	21.8012	6.45869	21.314	13.8863	1.73639	0.00267373	0.0240931
Trib3	14.7495	2.25284	9.20876	25.7527	19.8536	43.6025	8.73704	29.7363	19.2367	1.74057	0.00707676	0.0492423
Pmaip1	28.5772	68.7115	56.4037	207.797	93.8535	211.784	51.2308	171.145	111.188	1.74651	1.5e-05	0.000432534
Rab7b	15.6714	37.1718	29.9285	86.1382	27.9756	165.067	27.5906	93.0601	60.3253	1.7577	0.00295726	0.0259192
Slc22a21	29.4991	24.7812	17.2664	146.524	62.2682	35.2973	23.8489	81.3631	52.606	1.76815	0.000929477	0.0109243
Akap12	1054.59	622.91	654.973	4973.82	1656.88	1365.17	777.491	2665.29	1721.39	1.77728	0.00473438	0.0365457
Clic1	190.822	150.94	132.376	639.376	276.146	730.861	158.046	548.794	353.42	1.79352	1.82e-08	1.59e-06
Fgf2	141.042	125.032	132.376	717.522	311.341	357.125	132.817	461.996	297.407	1.79841	1.85e-09	2.05e-07
Epha2	28.5772	27.034	21.8708	126.987	66.7804	76.8234	25.8274	90.197	58.0122	1.8016	1.04e-06	4.95e-05
Igfbp3	259.96	283.858	201.442	1585.12	333	679.991	248.42	866.037	557.229	1.80163	0.0046472	0.0361459
Dpm3	70.9821	107.01	100.145	518.605	305.926	143.265	92.7124	322.599	207.656	1.80229	5.22e-06	0.000185519
Slc6a12	21.2025	13.517	9.20876	101.235	18.0488	35.2973	14.6427	51.5269	33.0848	1.80726	0.00622512	0.044763
Hmcn2	16.5932	16.8963	10.3599	104.787	27.9756	20.7631	14.6165	51.1751	32.8958	1.8076	0.00559578	0.0415032
Gimap5	4.60923	12.3906	9.20876	46.1772	30.6829	13.496	8.7362	30.1187	19.4274	1.80773	0.00435838	0.0344405
Cela1	22.1243	5.63209	29.9285	68.3778	61.3658	72.6708	19.2283	67.4715	43.3499	1.8081	0.000168975	0.00294982
Hbegf	129.98	165.584	212.953	787.676	470.17	522.192	169.505	593.346	381.426	1.8114	9.92e-14	2.73e-11
Zc3h12a	21.2025	9.01135	8.05767	64.8257	39.7073	32.1828	12.7572	45.5719	29.1645	1.81592	0.000528433	0.0071891
Cd93	164.089	163.331	206.046	971.497	333.902	573.061	177.822	626.153	401.988	1.81699	1.53e-08	1.36e-06
Pappa	23.968	9.01135	26.4752	86.1382	57.756	66.4419	19.8182	70.112	44.9651	1.81762	1.65e-05	0.000462955
Tspan4	194.509	100.251	82.8789	492.853	397.975	450.559	125.88	447.129	286.504	1.82125	1.83e-10	2.74e-08
Adam8	83.888	49.5624	111.656	240.654	145.293	488.971	81.7022	291.639	186.671	1.83465	1.69e-05	0.000468208
Mid1	44.2486	43.9303	40.2883	277.951	42.4146	138.075	42.8224	152.813	97.8179	1.8353	0.000647164	0.00832405
Rhbdf2	14.7495	19.1491	19.5686	82.5861	38.8048	69.5564	17.8224	63.6491	40.7358	1.8428	1.32e-05	0.000389574
Tnfrsf10b	14.7495	16.8963	11.511	49.7293	29.7805	76.8234	14.3856	52.1111	33.2483	1.85096	0.000120839	0.00228104
C1s1	17.5151	11.2642	31.0796	75.4819	60.4633	79.9379	19.9529	71.9611	45.957	1.8565	4.03e-06	0.000149251
Cd274	38.7175	37.1718	23.0219	185.597	61.3658	113.159	32.9704	120.04	76.5054	1.86054	1.95e-05	0.000523617
Ctsc	129.98	143.055	170.362	467.1	295.097	868.935	147.799	543.711	345.755	1.87937	1.67e-08	1.46e-06
Lrrc32	65.451	55.1945	117.412	555.902	173.268	153.647	79.3524	294.272	186.812	1.89205	0.0054226	0.0404409
Lbp	59.92	25.9076	52.9504	344.553	71.2926	100.701	46.2593	172.182	109.221	1.89447	0.000640111	0.00826912
Runx1	28.5772	19.1491	9.20876	101.235	37	75.7853	18.9784	71.3399	45.1592	1.89637	0.000227196	0.00370091
Adm	30.4209	29.2869	42.5905	170.5	139.878	70.5945	34.0994	126.991	80.5452	1.90298	6.21e-07	3.24e-05
Tead4	13.8277	10.1378	10.3599	67.4897	42.4146	18.6868	11.4418	42.8637	27.1527	1.90304	0.000740506	0.00917155
Crispld2	68.2166	42.8039	35.684	307.256	174.171	68.5182	48.9015	183.315	116.108	1.90306	8.68e-05	0.00173355
Samd11	35.0301	20.2755	14.9642	120.771	58.6585	86.1668	23.4233	88.5321	55.9777	1.9034	8.28e-06	0.000266747
Emp3	14.7495	22.5284	24.173	86.1382	36.0975	107.968	20.4836	76.7346	48.6091	1.91122	5.62e-05	0.00122719
Elf4	23.0461	22.5284	28.7774	115.443	53.2438	111.083	24.784	93.2564	59.0202	1.9134	1.15e-06	5.36e-05
Wdr62	18.4369	18.0227	18.4175	82.5861	71.2926	52.9459	18.2924	68.9415	43.617	1.91708	1.1e-07	7.35e-06
Tlr13	53.4671	55.1945	39.1372	208.685	91.1462	260.577	49.2663	186.803	118.035	1.91957	5.97e-07	3.12e-05
Zbtb42	15.6714	13.517	17.2664	84.3622	42.4146	50.8696	15.4849	59.2154	37.3502	1.93703	6.83e-06	0.000230552
Plin2	107.856	109.263	104.75	381.85	216.585	642.618	107.289	413.684	260.487	1.94579	6.86e-09	6.62e-07
Mt1	2202.29	1646.82	1240.88	9329.57	5922.7	4682.08	1696.66	6644.78	4170.72	1.96937	2.77e-07	1.63e-05
Arpc1b	212.025	157.699	154.247	741.499	446.707	871.012	174.657	686.406	430.531	1.9712	2.28e-15	7.88e-13
Col2a1	11.984	15.7699	11.511	92.3544	46.0243	15.5723	13.0883	51.317	32.2026	1.97677	0.00167706	0.0169026
Fgl2	33.1864	23.6548	37.9862	199.805	48.7316	127.693	31.6091	125.41	78.5095	1.98793	4.04e-05	0.000967952
Kdelr3	7.37477	3.37926	14.9642	48.8413	21.6585	31.1446	8.57275	33.8815	21.2271	1.9922	0.00106231	0.0120196
Ppl	34.1083	14.6434	6.90657	64.8257	136.268	22.8394	18.5528	74.6444	46.5986	1.99703	0.00380071	0.0310579
Rab32	33.1864	20.2755	18.4175	64.8257	71.2926	153.647	23.9598	96.5884	60.2741	1.99726	7.61e-06	0.000248438
Ms4a6b	18.4369	18.0227	29.9285	70.1538	63.1707	131.846	22.1294	88.39	55.2597	2.00093	1.78e-06	7.44e-05
Cd52	19.3588	18.0227	19.5686	74.5939	37	118.35	18.9834	76.6478	47.8156	2.00971	2.19e-05	0.00057453
Klhl40	62.6855	99.1248	67.9146	550.574	236.439	142.227	76.575	309.747	193.161	2.01873	2.83e-06	0.000111004
Apobr	15.6714	13.517	21.8708	51.5053	48.7316	106.93	17.0197	69.0556	43.0377	2.02002	9.62e-06	0.000298217
Myo1g	5.53107	12.3906	6.90657	27.5287	18.0488	55.0222	8.27608	33.5332	20.9047	2.0248	0.00103206	0.011785
Tmem252	150.261	31.5397	73.6701	520.381	235.536	297.95	85.1569	351.289	218.223	2.04194	0.00283644	0.0251845
Prg4	263.648	193.744	123.167	1394.2	252.683	755.776	193.52	800.885	497.202	2.04859	0.00419562	0.0335469
Msn	648.979	663.461	611.232	3376.26	1633.41	2960.82	641.224	2656.83	1649.03	2.05067	9e-20	7.04e-17
Ccn1	76.5132	107.01	194.535	857.83	172.366	547.107	126.019	525.768	325.894	2.06174	0.00431342	0.034225
Pla1a	23.968	23.6548	12.6621	125.211	46.0243	86.1668	20.0949	85.8008	52.9479	2.08771	5.95e-06	0.000205873
Depp1	16.5932	20.2755	27.6263	121.659	123.634	28.0302	21.4984	91.1078	56.3031	2.0912	0.000129269	0.00239738
Adgrf4	22.1243	23.6548	33.3818	211.349	89.3414	39.4499	26.387	113.38	69.8836	2.10848	0.000129422	0.00239738
F5	7.37477	28.1605	16.1153	106.563	89.3414	26.992	17.2169	74.2987	45.7578	2.1236	0.000428294	0.00614757
Slc14a1	206.493	119.4	100.145	905.783	411.512	549.184	142.013	622.16	382.086	2.12717	4.97e-11	8.29e-09
Trim47	40.5612	36.0454	48.346	197.141	164.244	197.249	41.6509	186.211	113.931	2.16203	5.06e-20	4.7e-17
Nlrc5	29.4991	14.6434	8.05767	102.123	18.9512	115.235	17.4001	78.7697	48.0849	2.165	0.00121609	0.0132645
Zfp385c	6.45292	3.37926	2.30219	11.5443	31.5853	12.4579	4.04479	18.5292	11.287	2.16858	0.00431077	0.034225
Slamf9	5.53107	12.3906	10.3599	41.7371	29.7805	55.0222	9.42718	42.1799	25.8035	2.17875	1.51e-05	0.000434068
Ppm1j	8.29661	4.50567	3.45329	41.7371	14.439	18.6868	5.41852	24.9543	15.1864	2.18146	0.00148951	0.0154851
Aldh1a2	176.073	157.699	109.354	979.489	266.219	773.425	147.708	673.045	410.376	2.18726	0.000100518	0.00194694
Sdc1	21.2025	20.2755	11.511	158.956	30.6829	52.9459	17.663	80.8616	49.2623	2.19155	0.000310371	0.00475838
Pdlim4	69.1384	58.5738	82.8789	377.41	317.658	268.882	70.197	321.317	195.757	2.1971	4.67e-24	6.3e-21
Spocd1	1.84369	3.37926	5.75548	20.4245	16.2439	12.4579	3.65947	16.3754	10.0174	2.19929	0.00207743	0.0199369
Rtl1	13.8277	3.37926	23.0219	111.891	16.2439	57.0985	13.4096	61.7444	37.577	2.2044	0.00307614	0.0266885
Cd36	15.6714	7.88493	10.3599	63.9376	10.8293	83.0524	11.3054	52.6064	31.9559	2.20702	0.00151116	0.0156663
Prtn3	6.45292	12.3906	10.3599	74.5939	29.7805	29.0683	9.73446	44.4809	27.1077	2.20822	0.000109928	0.00210886
Gbp2	45.1704	66.4587	59.857	455.556	98.3657	241.89	57.162	265.27	161.216	2.21699	1.23e-06	5.6e-05
Lpin3	25.8117	28.1605	9.20876	150.964	53.2438	91.3576	21.0603	98.5218	59.791	2.21964	9.48e-06	0.000295149
Itga5	57.1544	69.838	154.247	697.986	216.585	397.613	93.7464	437.395	265.571	2.22384	0.000478226	0.00663974
Fut4	9.21846	0	2.30219	19.5365	18.0488	18.6868	3.84022	18.7573	11.2988	2.22782	0.00672941	0.0474658
Tgif1	24.8898	15.7699	39.1372	174.941	64.0731	134.96	26.599	124.658	75.6284	2.2311	8.51e-07	4.23e-05
Il4ra	148.417	84.4814	105.901	560.342	341.122	697.64	112.933	533.035	322.984	2.23365	8.05e-15	2.54e-12
Snai1	5.53107	5.63209	1.1511	24.8646	14.439	19.7249	4.10475	19.6762	11.8905	2.23807	0.00111339	0.0124928
Pde6b	2.76554	4.50567	3.45329	18.6485	9.02438	22.8394	3.57483	16.8374	10.2061	2.24347	0.00227107	0.0213268
Parp3	64.5292	76.5965	87.4833	494.629	257.195	330.133	76.203	360.652	218.428	2.24696	1.48e-16	6.47e-14
Il1a	8.29661	10.1378	6.90657	67.4897	18.0488	35.2973	8.44698	40.2786	24.3628	2.25488	0.00021506	0.00355262
Tnc	77.435	109.263	81.7278	460.884	246.366	583.443	89.4751	430.231	259.853	2.26663	1.41e-13	3.75e-11
Atp2c2	25.8117	23.6548	14.9642	175.829	83.0243	51.9077	21.4769	103.587	62.5319	2.26666	3.87e-06	0.000144145
Col3a1	66.3729	47.3096	75.9723	408.491	66.7804	438.101	63.2183	304.457	183.838	2.26753	0.00315649	0.0272112
Tm4sf1	159.479	137.423	163.456	896.015	337.512	988.323	153.453	740.617	447.035	2.27031	3.87e-12	7.99e-10
Slc4a11	33.1864	25.9076	17.2664	172.276	125.439	72.6708	25.4535	123.462	74.4578	2.27063	2.11e-08	1.81e-06
Ifitm1	47.936	18.0227	21.8708	126.099	88.4389	216.974	29.2765	143.837	86.557	2.28107	4.93e-07	2.68e-05
Ch25h	35.952	16.8963	10.3599	104.787	89.3414	119.388	21.0694	104.505	62.7873	2.28521	4.86e-08	3.61e-06
Tnfsf8	4.60923	3.37926	1.1511	12.4323	16.2439	17.6486	3.04653	15.4416	9.24407	2.30345	0.00182125	0.0180416
Tagln2	167.776	116.021	163.456	828.525	531.536	865.821	149.084	741.961	445.522	2.31283	3.3e-25	4.9e-22
Csf2rb2	30.4209	12.3906	12.6621	108.339	38.8048	132.884	18.4912	93.3425	55.9168	2.31869	1.83e-05	0.000497779
Itgad	20.2806	2.25284	4.60438	55.0574	70.3902	12.4579	9.04594	45.9685	27.5072	2.32133	0.00451387	0.0353236
C4b	404.69	250.065	282.018	1668.59	1057.66	1984.95	312.258	1570.4	941.33	2.32783	6.15e-22	7.03e-19
Ltbp2	8.29661	5.63209	3.45329	33.7449	10.8293	44.6406	5.794	29.7383	17.7661	2.3365	0.000793008	0.00969487
Loxl2	11.984	7.88493	3.45329	51.5053	9.02438	59.1748	7.77407	39.9015	23.8378	2.34084	0.00175686	0.0175167
Srgn	121.684	102.504	93.2387	758.372	318.561	535.688	105.809	537.54	321.674	2.34266	9.16e-16	3.58e-13
Lrrc25	9.21846	4.50567	5.75548	31.9688	18.0488	50.8696	6.4932	33.6291	20.0611	2.34804	0.000125987	0.00234839
Hspb6	92.1846	56.3209	73.6701	569.223	318.561	261.615	74.0585	383.133	228.596	2.36783	6.92e-14	1.98e-11
Cdkn1a	364.129	367.212	541.015	3034.37	2261.51	1275.89	424.119	2190.59	1307.36	2.36928	1.08e-09	1.3e-07
Slc15a3	23.0461	18.0227	44.8927	142.972	84.8292	219.051	28.6539	148.95	88.8022	2.38226	6.48e-08	4.69e-06
Anxa2	228.618	186.986	201.442	1489.21	630.804	1101.48	205.682	1073.83	639.758	2.38326	2.39e-19	1.69e-16
Mlkl	2.76554	3.37926	3.45329	18.6485	11.7317	19.7249	3.19936	16.7017	9.95053	2.39057	0.000834838	0.0100668
Cxcl16	18.4369	13.517	27.6263	88.8023	32.4878	192.059	19.8601	104.45	62.1548	2.39469	5.25e-05	0.00116661
Olfr920	1.84369	7.88493	1.1511	32.8568	16.2439	7.26708	3.62657	18.7893	11.2079	2.39585	0.00688074	0.0482852
Soat2	7.37477	3.37926	2.30219	15.9844	14.439	40.488	4.35207	23.6371	13.9946	2.39992	0.0011447	0.0127288
Gpr35	11.984	11.2642	12.6621	56.8335	55.0487	78.8997	11.9701	63.594	37.782	2.40647	1.83e-09	2.04e-07
Igsf6	15.6714	6.75851	16.1153	74.5939	55.0487	76.8234	12.8484	68.822	40.8352	2.41056	6.07e-09	5.91e-07
Csf2rb	17.5151	20.2755	26.4752	139.42	55.9512	145.342	21.4219	113.571	67.4964	2.41147	2.85e-08	2.33e-06
Cebpd	81.1224	50.6888	36.8351	426.251	249.073	231.508	56.2154	302.277	179.246	2.41815	6.84e-13	1.56e-10
Otop2	8.29661	21.402	10.3599	163.396	41.5121	8.30524	13.3528	71.0712	42.212	2.41897	0.00396612	0.0319946
Tnfrsf1a	196.353	163.331	147.34	1019.45	689.463	1021.54	169.008	910.152	539.58	2.42514	1.97e-36	9.75e-33
Vim	666.494	491.119	599.721	3521.9	1606.34	4325.99	585.778	3151.41	1868.59	2.42734	1.37e-08	1.23e-06
Thbs1	79.2787	54.0681	52.9504	648.257	83.0243	274.073	62.0991	335.118	198.608	2.43114	0.00229077	0.0214489
S100a11	81.1224	37.1718	48.346	329.456	139.878	433.949	55.5467	301.094	178.321	2.43119	4.2e-09	4.34e-07
Vwce	10.1403	9.01135	10.3599	62.1616	82.1219	16.6105	9.83717	53.6313	31.7342	2.44972	6.75e-05	0.00142708
Map3k6	159.479	70.9644	57.5548	867.598	446.707	285.492	95.9995	533.266	314.633	2.47153	0.000103276	0.00199515
Bdkrb2	35.0301	19.1491	12.6621	215.79	80.317	85.1287	22.2804	127.078	74.6794	2.49949	6.53e-07	3.38e-05
Hspa1a	123.527	100.251	153.096	903.119	305.926	924.996	125.625	711.347	418.486	2.50147	1.12e-06	5.22e-05
Casp4	8.29661	1.12642	9.20876	28.4167	24.3658	53.984	6.2106	35.5889	20.8997	2.50239	0.000129799	0.00239886
Tmem106a	14.7495	9.01135	9.20876	46.1772	30.6829	112.121	10.9899	62.9936	36.9917	2.50326	1.53e-05	0.000437688
Atp2a1	1.84369	11.2642	4.60438	16.8724	71.2926	11.4197	5.90409	33.1949	19.5495	2.51248	0.00363093	0.0300874
Serpinb5	1.84369	5.63209	0	23.0886	9.92682	9.34339	2.49193	14.1196	8.30576	2.51433	0.00708931	0.0492835
Sphk1	58.0763	46.1832	31.0796	437.795	127.244	214.898	45.113	259.979	152.546	2.52233	4.83e-09	4.88e-07
Mt2	1630.75	1148.95	669.938	10509.8	4901.14	4454.72	1149.88	6621.87	3885.87	2.52559	4.15e-06	0.000153243
Nes	128.137	171.216	320.005	1630.41	432.268	1514.67	206.452	1192.45	699.45	2.53067	0.000148794	0.00265651
Fblim1	11.984	13.517	21.8708	107.451	48.7316	116.273	15.7906	90.8186	53.3046	2.53268	2.81e-08	2.3e-06
Slc44a3	3.68738	0	3.45329	19.5365	8.12194	14.5342	2.38022	14.0642	8.22221	2.53455	0.00387548	0.0314485
Col5a3	70.0603	81.1021	65.6124	524.822	476.487	255.386	72.2583	418.898	245.578	2.53708	1.63e-19	1.21e-16
Cybb	12.9058	6.75851	19.5686	103.011	27.0731	97.5865	13.0777	75.8901	44.4839	2.53771	1.49e-05	0.000430458
Fndc7	0	3.37926	3.45329	17.7605	10.8293	9.34339	2.27751	12.6444	7.46094	2.5407	0.0050964	0.0385696
Tuba1c	24.8898	18.0227	42.5905	197.141	61.3658	238.776	28.501	165.761	97.1309	2.5423	4e-07	2.25e-05
Hspa1b	63.6074	100.251	202.593	703.314	379.024	1054.76	122.15	712.368	417.259	2.54537	5.06e-05	0.00113691
Icam1	39.6394	41.6775	46.0438	399.61	132.658	210.745	42.4536	247.671	145.062	2.54657	4.47e-11	7.64e-09
AB124611	9.21846	2.25284	5.75548	36.4089	22.5609	44.6406	5.74226	34.5368	20.1396	2.55466	2.24e-05	0.000587758
Clcf1	24.8898	21.402	17.2664	158.956	66.7804	152.609	21.1861	126.115	73.6506	2.56614	4.3e-10	5.94e-08
Tgfbi	91.2627	55.1945	82.8789	409.379	138.975	818.066	76.4454	455.473	265.959	2.57391	0.000300925	0.00464714
P2ry2	9.21846	1.12642	6.90657	47.9532	20.7561	37.3736	5.75048	35.361	20.5557	2.59419	7.12e-05	0.00149233
Cd22	1.84369	1.12642	3.45329	10.6563	6.31707	21.8012	2.14113	12.9249	7.533	2.59676	0.00465846	0.0361828
Trim30b	2.76554	1.12642	3.45329	9.76825	8.12194	26.992	2.44841	14.9607	8.70458	2.59684	0.00337336	0.0285164
Ifitm6	1.84369	3.37926	3.45329	22.2006	18.9512	10.3815	2.89208	17.1778	10.0349	2.60099	0.000611884	0.00805151
Sult5a1	2.76554	1.12642	1.1511	7.10418	8.12194	16.6105	1.68102	10.6122	6.14661	2.60561	0.00635915	0.0485607
Aire	2.76554	0	4.60438	15.0964	22.5609	7.26708	2.45664	14.9748	8.71572	2.61151	0.00384527	0.0313015
Fcgr2b	70.9821	59.7002	65.6124	539.03	178.683	490.009	65.4316	402.574	234.003	2.6196	5.55e-13	1.31e-10
Cytip	6.45292	1.12642	1.1511	18.6485	23.4634	14.5342	2.91014	18.882	10.8961	2.62884	0.000740836	0.00917155
Procr	12.9058	10.1378	16.1153	112.779	27.0731	109.006	13.053	82.9528	48.0029	2.6679	2.52e-06	0.000100587
Rflna	1.84369	2.25284	4.60438	22.2006	10.8293	21.8012	2.9003	18.277	10.5887	2.68031	0.000443471	0.0063045
Pirb	6.45292	7.88493	8.05767	57.7215	22.5609	63.3274	7.46517	47.87	27.6676	2.68525	2.14e-06	8.75e-05
Tlr1	12.9058	13.517	10.3599	51.5053	51.439	134.96	12.2609	79.3015	45.7812	2.68673	1.55e-07	1.01e-05
Zfp36	52.5452	60.8266	49.4971	499.957	272.536	276.149	54.2896	349.547	201.919	2.68827	9.65e-21	9.56e-18
Il1b	11.0621	3.37926	3.45329	79.9221	11.7317	25.9539	5.9649	39.2025	22.5837	2.69127	0.000904625	0.0106999
Osgin1	9.21846	6.75851	6.90657	43.5131	14.439	92.3957	7.62785	50.116	28.8719	2.70482	8.81e-05	0.00175284
B430306N03Rik	4.60923	2.25284	1.1511	10.6563	12.6341	31.1446	2.67105	18.145	10.408	2.71308	0.00120841	0.0132293
Adamts9	99.5593	52.9417	88.6344	848.95	373.609	385.155	80.3785	535.905	308.142	2.73456	2.23e-15	7.88e-13
Mmp19	11.984	22.5284	6.90657	106.563	83.0243	87.205	13.8063	92.264	53.0352	2.74482	1.52e-11	2.93e-09
1700093K21Rik	4.60923	3.37926	4.60438	53.2814	24.3658	7.26708	4.19762	28.3048	16.2512	2.75505	0.000660191	0.00841512
Ifi204	12.9058	4.50567	4.60438	39.073	11.7317	100.701	7.33863	50.5019	28.9203	2.75814	0.000447627	0.00634479
Angpt2	39.6394	33.7926	29.9285	349.881	167.853	184.791	34.4535	234.175	134.314	2.76098	6.99e-16	2.88e-13
Htra4	14.7495	21.402	20.7197	229.998	108.293	50.8696	18.9571	129.72	74.3385	2.7821	1.21e-07	7.94e-06
Tnfrsf12a	49.7797	27.034	63.3103	356.985	320.365	288.607	46.708	321.986	184.347	2.78489	7.7e-26	1.27e-22
Gtse1	6.45292	6.75851	9.20876	24.8646	13.5366	117.311	7.4734	51.9042	29.6888	2.79603	0.000383861	0.00563502
Glipr2	50.7015	81.1021	64.4613	564.783	294.195	499.352	65.4217	452.777	259.099	2.79609	3.3e-23	4.08e-20
Ms4a6c	18.4369	21.402	12.6621	94.1304	86.634	187.906	17.5003	122.89	70.1952	2.80588	2.83e-11	5.07e-09
Stx11	5.53107	3.37926	10.3599	63.9376	33.3902	36.3354	6.4234	44.5544	25.4889	2.80708	7.67e-07	3.89e-05
Trh	34.1083	22.5284	32.2307	475.98	58.6585	90.3194	29.6224	208.319	118.971	2.81365	0.00217495	0.0206592
Steap1	0.921846	3.37926	3.45329	19.5365	11.7317	21.8012	2.5848	17.6898	10.1373	2.8169	0.000333196	0.00505098
Glycam1	3.68738	2.25284	0	8.88023	15.3414	19.7249	1.98007	14.6489	8.31447	2.82285	0.00155335	0.0160032
Osmr	171.463	109.263	134.678	951.072	573.951	1440.96	138.468	988.66	563.564	2.83285	1.81e-21	1.92e-18
Gpr65	0.921846	4.50567	6.90657	23.0886	18.0488	44.6406	4.11136	28.5927	16.352	2.83729	9.95e-05	0.00193307
Aspg	47.936	55.1945	37.9862	527.486	199.439	282.378	47.0389	336.434	191.737	2.83806	2e-15	7.26e-13
Ifi207	5.53107	13.517	1.1511	44.4011	11.7317	89.2813	6.73306	48.4714	27.6022	2.84736	0.000654478	0.00839263
C3ar1	22.1243	41.6775	57.5548	200.693	167.853	506.619	40.4522	291.722	166.087	2.85683	3.14e-10	4.59e-08
Aqp1	6.45292	7.88493	11.511	80.8101	34.2926	72.6708	8.61627	62.5912	35.6037	2.87386	2.63e-08	2.18e-06
Adamts1	251.664	148.687	270.507	2567.27	1323.88	1044.38	223.62	1645.18	934.399	2.87896	1.46e-09	1.68e-07
Cyp1b1	88.4972	61.953	41.4394	880.031	169.658	384.117	63.9632	477.935	270.949	2.89987	5.2e-05	0.00116057
Hp	1.84369	0	9.20876	35.5209	16.2439	29.0683	3.68415	26.9444	15.3143	2.90044	0.000483619	0.00670209
Gfap	4335.44	2230.31	1913.12	23577	13721.6	26129.3	2826.29	21142.6	11984.5	2.90304	4.63e-10	6.22e-08
Car9	1.84369	1.12642	5.75548	40.8491	16.2439	7.26708	2.90853	21.4533	12.1809	2.91042	0.00138227	0.0145742
Ush1c	7.37477	0	1.1511	23.0886	36.0975	8.30524	2.84195	22.4971	12.6695	2.92176	0.0025374	0.023112
Tlr2	22.1243	22.5284	11.511	195.365	74.9024	160.914	18.7212	143.727	81.2242	2.93286	1.94e-11	3.61e-09
Socs3	106.012	67.5851	69.0657	951.072	342.024	565.794	80.8877	619.63	350.259	2.93312	7.18e-18	3.95e-15
Rab20	6.45292	3.37926	2.30219	43.5131	18.0488	34.2591	4.04479	31.9403	17.9926	2.94458	9.56e-06	0.000297143
Gpr84	6.45292	9.01135	10.3599	74.5939	40.6097	86.1668	8.60804	67.1235	37.8658	2.97529	1.13e-09	1.36e-07
Dnmt3l	2.76554	0	2.30219	14.2084	7.2195	19.7249	1.68924	13.7176	7.70342	2.97801	0.00174209	0.0174162
Tnfsf9	7.37477	1.12642	5.75548	54.1694	42.4146	19.7249	4.75222	38.7696	21.7609	3.00596	7.77e-06	0.000251971
Ascl2	0.921846	2.25284	3.45329	35.5209	8.12194	8.30524	2.20932	17.316	9.76268	3.00991	0.00195459	0.0189786
Apol6	0	1.12642	3.45329	12.4323	18.9512	4.15262	1.52657	11.8454	6.68597	3.03116	0.00580605	0.0425668
Capg	48.8578	19.1491	24.173	315.248	138.975	309.37	30.7266	254.531	142.629	3.03545	1.68e-13	4.39e-11
Acp5	4.60923	0	1.1511	18.6485	21.6585	10.3815	1.92011	16.8962	9.40814	3.05524	0.000710138	0.00889529
Bcl2a1b	0.921846	2.25284	3.45329	13.3203	10.8293	30.1065	2.20932	18.0854	10.1473	3.06633	0.000417181	0.00602884
Maff	46.0923	11.2642	33.3818	291.271	313.146	162.99	30.2461	255.803	143.024	3.06928	2.36e-13	5.95e-11
Rhoj	105.09	57.4474	70.2168	1078.95	509.877	382.041	77.5849	656.955	367.27	3.07991	3.64e-09	3.84e-07
Ccl6	24.8898	13.517	14.9642	181.157	35.1951	240.852	17.7904	152.401	85.0958	3.08954	2.59e-07	1.54e-05
Chrnb4	6.45292	3.37926	3.45329	6.21616	102.878	5.19077	4.42849	38.095	21.2617	3.09496	0.00381246	0.0311189
Pilra	0.921846	6.75851	4.60438	31.0808	15.3414	58.1367	4.09491	34.853	19.4739	3.12294	4.46e-05	0.00103621
Wnt9b	9.21846	2.25284	2.30219	79.034	38.8048	5.19077	4.59116	41.0099	22.8005	3.13068	0.00073533	0.00911858
Lox	13.8277	11.2642	11.511	228.222	28.878	65.4037	12.2009	107.501	59.8511	3.13723	2.95e-06	0.00011472
Cd44	125.371	70.9644	50.6482	900.455	399.78	879.317	82.3279	726.517	404.423	3.13806	1.52e-09	1.71e-07
Fgr	3.68738	6.75851	2.30219	42.6251	18.0488	51.9077	4.24936	37.5272	20.8883	3.14425	3.08e-06	0.000118178
Itgax	0	7.88493	1.1511	21.3125	6.31707	51.9077	3.01201	26.5124	14.7622	3.16693	0.0031186	0.0269203
Scara5	13.8277	6.75851	4.60438	162.508	24.3658	42.5643	8.39686	76.4794	42.4382	3.17021	1.63e-05	0.000458226
Xlr4a	1.84369	0	3.45329	19.5365	5.41463	22.8394	1.76566	15.9302	8.84792	3.17308	0.00143741	0.0150276
Il1r2	6.45292	0	6.90657	62.1616	16.2439	43.6025	4.45316	40.6693	22.5612	3.17491	4.57e-05	0.00105317
S100a8	9.21846	0	8.05767	63.9376	52.3414	43.6025	5.75871	53.2938	29.5263	3.18296	8.85e-08	6.17e-06
Akr1b8	15.6714	7.88493	3.45329	96.7945	54.1463	103.815	9.0032	84.9187	46.961	3.19988	4.22e-10	5.91e-08
Mfrp	4.60923	0	3.45329	42.6251	31.5853	1.03815	2.6875	25.0829	13.8852	3.20376	0.00563343	0.0417616
Ulbp1	2.76554	0	2.30219	12.4323	6.31707	31.1446	1.68924	16.6313	9.16029	3.2576	0.0013779	0.0145591
Slc43a3	7.37477	1.12642	5.75548	80.8101	24.3658	35.2973	4.75222	46.8244	25.7883	3.2781	3.21e-06	0.000122441
Gldn	19.3588	31.5397	24.173	476.868	151.61	100.701	25.0238	243.06	134.042	3.28506	3.79e-10	5.36e-08
Serpinf2	3.68738	3.37926	3.45329	29.3048	61.3658	12.4579	3.50664	34.3761	18.9414	3.29455	1.78e-05	0.000486532
Plaur	20.2806	22.5284	18.4175	382.738	90.2438	130.807	20.4088	201.263	110.836	3.30258	1.08e-10	1.72e-08
Rgs1	0.921846	2.25284	4.60438	30.1928	12.6341	32.1828	2.59302	25.0032	13.7981	3.31349	3.21e-05	0.000791118
Eda2r	5.53107	1.12642	2.30219	16.8724	18.0488	61.2511	2.98656	32.0574	17.522	3.37459	4.95e-05	0.00111656
Srpx	0.921846	2.25284	0	12.4323	4.51219	16.6105	1.05823	11.185	6.12161	3.39795	0.00293713	0.027693
Ctla2a	80.2006	48.436	42.5905	1139.33	406.097	273.035	57.0757	606.155	331.615	3.40673	4.64e-07	2.55e-05
Krt18	1.84369	1.12642	2.30219	39.073	13.5366	3.11446	1.75743	18.5747	10.1661	3.40693	0.00149568	0.0155383
Has2	1.84369	2.25284	1.1511	33.7449	7.2195	16.6105	1.74921	19.1916	10.4704	3.45198	0.000276581	0.00433884
Cst7	0	4.50567	0	9.76825	9.02438	30.1065	1.50189	16.2997	8.9008	3.48492	0.00213505	0.0203715
S100a9	19.3588	5.63209	5.75548	175.829	119.122	60.213	10.2488	118.388	64.3183	3.4986	3.43e-10	4.89e-08
Ccl9	31.3428	20.2755	20.7197	315.248	63.1707	454.712	24.1127	277.71	150.911	3.52262	8.33e-06	0.000267204
Hspb1	81.1224	60.8266	70.2168	1424.39	393.463	668.571	70.722	828.808	449.765	3.54998	7.53e-11	1.24e-08
Gm49391	0.921846	3.37926	0	29.3048	15.3414	5.19077	1.4337	16.6123	9.02301	3.55582	0.00103978	0.0118366
Cd109	34.1083	16.8963	27.6263	551.462	212.073	185.83	26.2103	316.455	171.333	3.58757	4.16e-16	1.77e-13
Ccl24	1.84369	1.12642	0	17.7605	6.31707	13.496	0.990037	12.5245	6.75727	3.59082	0.00112376	0.0125807
Bcl2a1a	1.84369	1.12642	1.1511	23.0886	9.92682	17.6486	1.37374	16.888	9.13087	3.59303	0.000134594	0.00245642
Ifi211	0.921846	0	2.30219	8.88023	1.80488	28.0302	1.07468	12.9051	6.98989	3.59311	0.00583909	0.0426658
Sele	4.60923	1.12642	0	41.7371	6.31707	24.9157	1.91188	24.3233	13.1176	3.5935	0.000405116	0.00588409
Tfpi2	2.76554	1.12642	0	24.8646	6.31707	19.7249	1.29732	16.9689	9.1331	3.62823	0.00046542	0.00649839
Cd14	24.8898	24.7812	36.8351	587.871	154.317	341.553	28.8354	361.247	195.041	3.65112	3.47e-17	1.61e-14
C3	11.0621	5.63209	10.3599	171.388	66.7804	104.854	9.01803	114.341	61.6794	3.65466	9.54e-14	2.67e-11
Spp1	522.687	129.538	117.412	2749.32	943.048	6005.72	256.545	3232.7	1744.62	3.65479	0.000134566	0.00245642
AA467197	4.60923	1.12642	1.1511	38.185	9.02438	43.6025	2.29558	30.2706	16.2831	3.66054	3.54e-05	0.000861692
Cyp4f18	0.921846	0	2.30219	15.0964	9.92682	15.5723	1.07468	13.5318	7.30326	3.67274	0.000442455	0.00629609
Ms4a6d	17.5151	13.517	19.5686	183.821	125.439	359.201	16.8669	222.82	119.844	3.72109	5.91e-18	3.51e-15
Tnfaip2	4.60923	11.2642	9.20876	243.318	37	62.2893	8.36073	114.202	61.2816	3.78658	6.14e-08	4.49e-06
Wnt11	0.921846	0	1.1511	11.5443	11.7317	6.22893	0.69098	9.83497	5.26298	3.81564	0.0022363	0.0225987
A2m	98.6375	67.5851	59.857	1249.45	846.487	1123.28	75.3599	1073.07	574.216	3.82073	1.71e-70	2.55e-66
Cryba2	5.53107	1.12642	1.1511	90.5783	21.6585	1.03815	2.60286	37.7583	20.1806	3.82432	0.00133666	0.0142654
Hmga2	2.76554	0	0	21.3125	9.92682	13.496	0.921846	14.9118	7.91682	3.86791	0.000437402	0.00624813
Bst1	5.53107	0	0	25.7527	15.3414	46.717	1.84369	29.2704	15.557	3.87102	5.3e-05	0.00116892
Selp	5.53107	1.12642	2.30219	61.2736	24.3658	50.8696	2.98656	45.503	24.2448	3.87358	3.8e-08	2.93e-06
Milr1	2.76554	3.37926	2.30219	39.961	24.3658	60.213	2.81566	41.5133	22.1645	3.8779	2.9e-08	2.33e-06
Fcgr4	1.84369	4.50567	3.45329	34.6329	42.4146	65.4037	3.26755	47.4837	25.3756	3.88926	1.36e-09	1.58e-07
Msh5	0.921846	1.12642	0	18.6485	8.12194	5.19077	0.682755	10.6537	5.66824	3.93646	0.00238757	0.0236816
Steap4	8.29661	4.50567	6.90657	202.469	46.0243	58.1367	6.56962	102.21	54.3898	3.95079	1.49e-09	1.69e-07
Tafa3	1.84369	1.12642	0	30.1928	9.02438	9.34339	0.990037	16.1868	8.58844	3.96849	0.000437003	0.00624813
Slfn1	0.921846	1.12642	1.1511	15.9844	4.51219	30.1065	1.06645	16.8677	8.96707	3.98678	0.000456768	0.00641981
Bcl3	10.1403	4.50567	5.75548	143.86	92.9511	100.701	6.80048	112.504	59.6522	4.01503	4.62e-19	2.98e-16
Il18rap	0.921846	1.12642	4.60438	51.5053	19.8536	35.2973	2.21755	35.5521	18.8848	4.05243	4.27e-07	2.39e-05
Clec4d	4.60923	0	1.1511	71.0418	6.31707	22.8394	1.92011	33.3994	17.6598	4.05603	0.000166303	0.00290658
Cd300lb	1.84369	0	0	11.5443	6.31707	16.6105	0.614564	11.4906	6.05259	4.06117	0.00153115	0.0170448
Emp1	43.3267	23.6548	32.2307	966.169	217.488	494.162	33.0707	559.273	296.172	4.0771	4.32e-10	5.94e-08
Gpr151	7.37477	4.50567	4.60438	28.4167	223.805	28.0302	5.49494	93.4172	49.4561	4.07735	7.68e-07	3.89e-05
Slc38a8	0.921846	0	0	7.99221	8.12194	3.11446	0.307282	6.40954	3.35841	4.08348	0.00594166	0.0461023
Cym	0	0	2.30219	25.7527	4.51219	7.26708	0.767397	12.5106	6.63902	4.11744	0.00281874	0.0250749
Ucn2	0	0	1.1511	4.44011	3.60975	12.4579	0.383698	6.83591	3.6098	4.15669	0.00590125	0.0459214
C5ar1	9.21846	3.37926	4.60438	73.7059	74.9024	171.295	5.73403	106.635	56.1843	4.17957	1.03e-13	2.77e-11
Ccr2	2.76554	0	3.45329	16.8724	13.5366	84.0905	2.07294	38.1665	20.1197	4.18448	2.47e-05	0.000637146
Atf3	15.6714	9.01135	24.173	340.113	215.683	345.705	16.2852	300.5	158.393	4.21005	1.61e-34	4.79e-31
Lilrb4a	5.53107	10.1378	2.30219	125.211	55.0487	162.99	5.99034	114.417	60.2035	4.25457	1.73e-13	4.44e-11
Slfn4	4.60923	2.25284	0	38.185	16.2439	83.0524	2.28736	45.8271	24.0572	4.2594	1.21e-06	5.54e-05
Osm	0	0	2.30219	11.5443	8.12194	21.8012	0.767397	13.8225	7.29495	4.26283	0.000679668	0.00858601
Il1f9	0	1.12642	0	7.10418	2.70731	12.4579	0.375473	7.42312	3.89929	4.27847	0.00442527	0.0373205
Flnc	35.0301	47.3096	37.9862	1249.45	445.804	674.8	40.1086	790.018	415.063	4.30322	8.13e-36	3.02e-32
Hmox1	96.7938	77.7229	82.8789	1803.57	482.804	2966.01	85.7985	1750.8	918.297	4.35042	5.24e-10	6.89e-08
Serpina3n	488.578	319.903	226.766	9582.65	3539.36	8356.11	345.082	7159.37	3752.23	4.37407	4.18e-19	2.82e-16
Rab44	0	0	1.1511	17.7605	2.70731	3.11446	0.383698	7.86074	4.12222	4.37656	0.00604604	0.0466872
Il11	3.68738	5.63209	3.45329	154.516	43.317	67.48	4.25759	88.4377	46.3476	4.3843	1.77e-11	3.36e-09
Ccl5	0.921846	0	0	9.76825	1.80488	12.4579	0.307282	8.01033	4.1588	4.39124	0.00418873	0.0358894
Cd300lf	6.45292	2.25284	2.30219	104.787	64.9755	70.5945	3.66932	80.1189	41.8941	4.39166	1.13e-14	3.5e-12
Tnfsf11	0	1.12642	0	13.3203	5.41463	5.19077	0.375473	7.97525	4.17536	4.39634	0.00260131	0.0252725
Lgals3	8.29661	9.01135	10.3599	147.412	82.1219	362.316	9.22261	197.283	103.253	4.42178	1.69e-15	6.29e-13
Retnlg	2.76554	0	0	35.5209	28.878	1.03815	0.921846	21.8124	11.3671	4.45745	0.0012765	0.0137518
Ssxb8	0	0	0	7.10418	2.70731	3.11446	0	4.30865	2.15433	4.46918	0.00614491	0.0472921
Gal	2.76554	2.25284	4.60438	182.933	19.8536	9.34339	3.20759	70.7099	36.9587	4.47061	9.75e-06	0.00030115
Lif	15.6714	9.01135	4.60438	475.092	148.902	47.7551	9.76237	223.917	116.839	4.51139	7.67e-06	0.00024971
Oit3	1.84369	0	0	21.3125	15.3414	10.3815	0.614564	15.6785	8.14654	4.51154	0.0002169	0.00356445
F10	0	0	1.1511	7.99221	0.902438	17.6486	0.383698	8.84776	4.61573	4.53251	0.00508519	0.0412241
Nxpe5	0	0	0	2.66407	2.70731	8.30524	0	4.55887	2.27944	4.53379	0.00584797	0.0456463
Lcn2	76.5132	32.6661	43.7416	2272.45	664.194	760.967	50.9737	1232.54	641.756	4.59284	8.79e-12	1.76e-09
Cxcr2	0.921846	0	2.30219	21.3125	13.5366	42.5643	1.07468	25.8045	13.4396	4.60027	1.05e-05	0.000318843
Dhh	0.921846	0	0	12.4323	2.70731	13.496	0.307282	9.54521	4.92625	4.6458	0.00173671	0.0186623
Gsdma	0	0	0	2.66407	9.92682	2.07631	0	4.88907	2.44453	4.65257	0.0056059	0.0444827
Ccr1	3.68738	3.37926	2.30219	121.659	22.5609	102.777	3.12294	82.3325	42.7277	4.70803	4.52e-10	6.16e-08
Pdcd1	0	0	0	6.21616	0.902438	8.30524	0	5.14128	2.57064	4.71262	0.00554662	0.0440632
Saa2	0	0	0	5.32814	1.80488	9.34339	0	5.49213	2.74607	4.80572	0.00301579	0.028194
Mmp8	0.921846	0	0	2.66407	25.2683	4.15262	0.307282	10.695	5.50113	4.81764	0.0024822	0.0244099
Drd4	0.921846	2.25284	0	70.1538	18.9512	1.03815	1.05823	30.0477	15.553	4.83153	0.000380226	0.00559271
Acod1	0.921846	0	0	27.5287	0.902438	5.19077	0.307282	11.2073	5.75729	4.88522	0.003563	0.0318142
Serpine1	12.9058	24.7812	18.4175	1052.31	247.268	372.697	18.7015	557.424	288.063	4.902	2.94e-12	6.33e-10
Piwil4	0	0	0	8.88023	2.70731	6.22893	0	5.93882	2.96941	4.92714	0.00154657	0.017179
Ly6c2	0	0	0	3.55209	5.41463	9.34339	0	6.10337	3.05168	4.95851	0.00120747	0.0142386
Krt8	0	0	1.1511	23.0886	12.6341	0	0.383698	11.9076	6.14564	4.97394	0.00396468	0.0342816
Cd300ld	0	0	3.45329	35.5209	17.1463	52.9459	1.1511	35.2044	18.1777	5.02784	1.17e-06	5.4e-05
Chil3	3.68738	0	1.1511	50.6173	27.0731	95.5102	1.61283	57.7336	29.6732	5.06745	5.51e-09	5.5e-07
Serpina3i	0.921846	1.12642	0	66.6017	0.902438	5.19077	0.682755	24.2316	12.4572	5.12561	0.00121395	0.0132509
Fabp4	0	1.12642	0	17.7605	9.92682	12.4579	0.375473	13.3817	6.87859	5.13873	0.000143753	0.00258563
Kng2	0	0	0	9.76825	1.80488	9.34339	0	6.97217	3.48609	5.15535	0.00113058	0.0136095
Lrrc15	0	0	0	13.3203	5.41463	2.07631	0	6.93709	3.46855	5.15928	0.00128966	0.0149345
Fpr1	0	0	0	12.4323	5.41463	3.11446	0	6.98714	3.49357	5.16893	0.000859736	0.0111234
Ccl12	2.76554	5.63209	5.75548	84.3622	52.3414	366.469	4.7177	167.724	86.2209	5.16912	3.35e-12	7.03e-10
Tubb6	15.6714	9.01135	9.20876	590.535	239.146	422.529	11.2972	417.403	214.35	5.18563	6.34e-37	4.71e-33
Trem1	0.921846	0	0	20.4245	11.7317	10.3815	0.307282	14.1793	7.24327	5.22482	0.00011621	0.00219927
Cxcl10	1.84369	2.25284	4.60438	271.735	18.0488	52.9459	2.9003	114.243	58.5718	5.31218	1.45e-05	0.000421612
Ptx3	4.60923	4.50567	5.75548	264.631	146.195	180.639	4.95679	197.155	101.056	5.3211	3.32e-28	8.22e-25
F7	0	0	0	7.99221	4.51219	12.4579	0	8.32075	4.16037	5.40727	0.000238787	0.00416726
Tnf	0	0	1.1511	33.7449	7.2195	9.34339	0.383698	16.7693	8.57648	5.46689	0.000149725	0.00266704
H2-Q10	0	0	0	7.99221	1.80488	17.6486	0	9.14857	4.57428	5.54284	0.000512477	0.00757337
Slc28a2	0	0	0	8.88023	6.31707	12.4579	0	9.21838	4.60919	5.55659	9.86e-05	0.00207937
Il19	0	1.12642	0	33.7449	9.02438	12.4579	0.375473	18.409	9.39225	5.60081	6.07e-05	0.00130189
Prr32	0	0	0	13.3203	9.92682	5.19077	0	9.47931	4.73966	5.60781	0.000101056	0.0021113
Tnn	1.84369	0	1.1511	123.435	19.8536	11.4197	0.998262	51.5695	26.2839	5.6402	2.53e-06	0.000100956
Loxl4	0	0	0	14.2084	8.12194	7.26708	0	9.8658	4.9329	5.66336	6.76e-05	0.00154711
Saa1	0	0	0	17.7605	7.2195	6.22893	0	10.403	5.20148	5.74098	8.04e-05	0.00176686
Timp1	11.984	6.75851	3.45329	693.546	106.488	410.071	7.3986	403.368	205.383	5.7546	1.1e-10	1.74e-08
Otos	0	0	0	6.21616	25.2683	1.03815	0	10.8409	5.42043	5.79993	0.000603678	0.00857499
Lilr4b	1.84369	1.12642	5.75548	208.685	54.1463	287.569	2.90853	183.467	93.1877	6.00754	7.66e-16	3.08e-13
Slc10a6	1.84369	1.12642	0	129.651	30.6829	63.3274	0.990037	74.5539	37.772	6.15977	1.17e-09	1.39e-07
Hcar2	0	0	1.1511	38.185	18.0488	29.0683	0.383698	28.434	14.4089	6.2248	1.56e-06	6.78e-05
Cd244a	0	1.12642	1.1511	42.6251	48.7316	68.5182	0.759171	53.2916	27.0254	6.23137	1.22e-08	1.11e-06
Serpina3m	0.921846	0	0	57.7215	11.7317	16.6105	0.307282	28.6879	14.4976	6.24026	8.3e-06	0.000266747
Il6	0	0	1.1511	71.0418	3.60975	15.5723	0.383698	30.0746	15.2292	6.30748	3.96e-05	0.00095255
Bcl2a1d	0	0	0	18.6485	6.31707	21.8012	0	15.5889	7.79446	6.31589	7.06e-06	0.000235586
Ccl4	0.921846	0	1.1511	45.2892	29.7805	93.4339	0.69098	56.1678	28.4294	6.31795	4.36e-08	3.29e-06
Ccl7	1.84369	0	0	77.258	20.7561	68.5182	0.614564	55.5108	28.0627	6.3267	9.44e-08	6.47e-06
Phox2a	0	0	0	15.9844	12.6341	20.7631	0	16.4605	8.23027	6.3945	1.65e-06	7.11e-05
Fosl1	0	1.12642	4.60438	172.276	93.8535	184.791	1.91027	150.307	76.1087	6.39843	3.88e-18	2.4e-15
Klk9	0.921846	0	0	55.0574	9.02438	33.2209	0.307282	32.4342	16.3708	6.4148	3.65e-06	0.000136554
Ccl2	1.84369	1.12642	4.60438	454.668	33.3902	179.601	2.52483	222.553	112.539	6.47369	6.64e-08	4.76e-06
Ccl3	2.76554	1.12642	0	181.157	46.0243	146.38	1.29732	124.52	62.9088	6.48998	3.47e-13	8.59e-11
Clec4e	0	0	0	28.4167	6.31707	18.6868	0	17.8069	8.90343	6.51137	4.29e-06	0.000157594
ETV3L	0.921846	0	0	92.3544	9.02438	3.11446	0.307282	34.8311	17.5692	6.51971	5.01e-05	0.00112907
Chmp4c	0	0	0	27.5287	23.4634	5.19077	0	18.7276	9.36381	6.5893	4.17e-06	0.000153832
A730049H05Rik	0	0	0	33.7449	10.8293	13.496	0	19.3567	9.67836	6.63478	1.72e-06	7.22e-05
Ccl11	0	0	1.1511	88.8023	5.41463	25.9539	0.383698	40.0569	20.2203	6.72039	5.89e-06	0.000205254
Saa3	0.921846	0	1.1511	180.269	60.4633	45.6788	0.69098	95.4703	48.0806	7.08913	1.27e-09	1.5e-07
Fga	0	0	0	71.0418	12.6341	2.07631	0	28.5841	14.292	7.19485	0.00198933	0.0192531
Mmp12	0	0	1.1511	54.1694	8.12194	105.892	0.383698	56.061	28.2224	7.20183	4.41e-07	2.45e-05
Mmp3	0.921846	0	1.1511	284.167	17.1463	73.709	0.69098	125.008	62.8493	7.48459	2.98e-06	0.000115255
Msr1	2.76554	2.25284	0	309.92	131.756	541.917	1.67279	327.864	164.768	7.57085	3.46e-14	1.03e-11
Arg1	1.84369	0	0	113.667	7.2195	329.095	0.614564	149.994	75.3042	7.843	7.35e-05	0.00152691
Tgm1	1.84369	0	4.60438	1276.09	225.609	831.562	2.14936	777.753	389.951	8.51021	5.07e-14	1.48e-11
Il1rn	0	0	0	120.771	36.0975	128.731	0	95.1999	47.6	8.92873	5.04e-12	1.03e-09
