# Supplementary material for: Effect of Celastrol on LncRNAs and mRNAs Profiles of Cerebral Ischemia-Reperfusion Injury in Transient Middle Cerebral Artery Occlusion Mice Model
Source: Front Neurosci. 2022 May 23;16:889292. doi: 10.3389/fnins.2022.889292 (PMC9169531; doi:10.3389/fnins.2022.889292)
Supplement: Supplementary file 5 [file Table_5.XLSX]

## Sheet: Supplementary Table 5
gene_name	tMCAO_1	tMCAO_2	tMCAO_3	Cela_1	Cela_2	Cela_3	Cela_mean	tMCAO_mean	baseMean	log2FoldChange	pvalue	padj
Pdcd2	204.933	195.353	187.307	0	0	0	0	195.865	97.9323	-10.0533	5.02e-17	1.08e-14
Pcdhga10	166.567	128.32	164.438	0	0	0	0	153.108	76.5542	-9.69712	1.07e-15	1.94e-13
Ilk	1563.67	1431.63	1687.94	5.77427	4.49985	4.6525	4.97554	1561.08	783.028	-8.28765	2.36e-99	9.68e-96
B430305J03Rik	57.0819	38.3046	39.2037	0	0	0	0	44.8634	22.4317	-7.92814	3.18e-10	3.77e-08
Sco2	35.5592	33.5165	26.1358	0	0	0	0	31.7372	15.8686	-7.42935	5.34e-09	5.48e-07
Tagln	574.562	98.6343	307.096	4.8119	1.12496	1.861	2.59929	326.764	164.682	-6.95765	1.34e-12	1.98e-10
Zfp784	51.4673	71.8211	119.789	0	2.24993	0	0.749975	81.0259	40.8879	-6.90813	6.41e-10	7.11e-08
Sp6	8.42192	31.6013	11.9789	0	0	0	0	17.334	8.66702	-6.55627	4.5e-06	0.000281831
Icam4	18.7154	17.2371	7.62295	0	0	0	0	14.5251	7.26257	-6.305	5.32e-06	0.000325863
Dnaaf4	11.2292	3.83046	16.3349	0	0	0	0	10.4649	5.23243	-5.82133	8.3e-05	0.00354981
E130208F15Rik	5.61462	18.1947	5.44496	0	0	0	0	9.75142	4.87571	-5.72827	0.000133463	0.00536927
Ldhal6b	14.9723	8.61854	4.35597	0	0	0	0	9.3156	4.6578	-5.6657	0.000117955	0.00486463
Pus3	240.493	170.455	191.663	4.8119	4.49985	2.7915	4.03442	200.87	102.452	-5.64991	4.11e-31	2.7e-28
B3gnt4	7.48616	11.4914	7.62295	0	0	0	0	8.86683	4.43341	-5.58916	7.74e-05	0.00333624
Cldn22	3.74308	19.1523	3.26698	0	0	0	0	8.72078	4.36039	-5.56767	0.000549455	0.0187111
Serinc4	10.2935	6.70331	7.62295	0	0	0	0	8.20657	4.10329	-5.47759	0.000118836	0.00488866
A530084C06Rik	4.67885	12.449	6.53395	0	0	0	0	7.88727	3.94363	-5.41994	0.000239409	0.00893106
H2ac19	2.80731	1.91523	18.5129	0	0	0	0	7.74514	3.87257	-5.38185	0.00160128	0.0450829
Gnpnat1	285.41	282.496	254.824	7.69903	8.9997	8.37451	8.35775	274.243	141.301	-5.04157	4.56e-49	7.48e-46
Mt2	11074.8	5200.81	4672.87	334.908	80.9973	241.93	219.278	6982.83	3601.06	-4.99222	1.01e-14	1.74e-12
Npffr2	2.80731	8.61854	5.44496	0	0	0	0	5.6236	2.8118	-4.92988	0.00137193	0.0396458
Bricd5	5.61462	5.74569	5.44496	0	0	0	0	5.60176	2.80088	-4.92549	0.000869183	0.0275953
Rangrf	97.32	124.49	109.988	2.88714	7.87474	1.861	4.20763	110.599	57.4035	-4.77538	2.74e-20	8.34e-18
Gm28043	22.4585	21.0675	28.3138	0	3.37489	0	1.12496	23.9466	12.5358	-4.55064	5.54e-06	0.000335554
Gnas	24989.7	24901.8	22341.8	976.815	816.723	1356.67	1050.07	24077.8	12563.9	-4.51841	2.24e-118	1.22e-114
Cox20	168.438	180.989	258.091	9.62379	7.87474	9.30501	8.93451	202.506	105.72	-4.49407	1.22e-31	8.72e-29
Hsd3b7	31.8162	17.2371	17.4239	1.92476	1.12496	0	1.01657	22.159	11.5878	-4.46939	1.08e-05	0.000604206
Phox2a	16.8438	13.4066	21.7798	2.88714	0	0	0.962379	17.3434	9.15291	-4.12468	9.15e-05	0.00385918
Zfp593	160.017	125.448	161.171	5.77427	14.6245	11.166	10.5216	148.878	79.7	-3.84057	2.26e-24	8.64e-22
Nudt8	15.9081	9.57615	16.3349	0	3.37489	0	1.12496	13.9397	7.53233	-3.75585	0.000619458	0.0207506
Smco3	137.558	220.251	82.7634	5.77427	7.87474	19.5405	11.0632	146.858	78.9604	-3.71934	3.1e-12	4.31e-10
Ccdc22	14.9723	30.6437	15.2459	0.962379	4.49985	0	1.82074	20.2873	11.054	-3.56357	0.000140642	0.00564401
Fen1	376.179	336.123	225.421	29.8338	23.6242	26.9845	26.8142	312.575	169.694	-3.54027	1.19e-33	9.27e-31
Fosl1	181.539	99.592	193.841	24.0595	1.12496	16.749	13.9778	158.324	86.1509	-3.48429	1.4e-08	1.34e-06
Slirp	327.519	389.749	340.855	44.2694	19.1244	39.081	34.1583	352.708	193.433	-3.35277	4.28e-35	3.7e-32
Ikzf5	389.28	484.553	424.707	42.3447	51.7483	46.525	46.8727	432.847	239.86	-3.21139	8.12e-57	1.67e-53
Isl1	127.265	9.57615	172.061	5.77427	8.9997	21.4015	12.0585	102.967	57.5128	-3.08857	0.000280816	0.0102429
Nrarp	221.777	416.563	323.431	34.6456	32.6239	48.386	38.5519	320.59	179.571	-3.05054	3.78e-23	1.38e-20
Cmtr1	584.856	630.111	583.7	88.5389	58.4981	75.3706	74.1358	599.555	336.846	-3.00814	2.36e-65	6.46e-62
Nr2c2ap	211.484	200.142	250.468	25.9842	24.7492	32.5675	27.767	220.698	124.232	-2.98323	6.66e-31	4.05e-28
Pllp	451.041	454.867	627.26	82.7646	37.1238	75.3706	65.0863	511.056	288.071	-2.96427	4.4e-25	1.76e-22
Ccpg1	133.815	255.683	167.705	36.5704	23.6242	19.5405	26.5784	185.734	106.156	-2.80372	3.09e-14	5.18e-12
Hvcn1	125.393	73.7364	106.721	21.1723	17.9994	7.44401	15.5386	101.95	58.7444	-2.72193	4.2e-10	4.82e-08
Spsb3	870.266	846.532	646.861	130.884	141.745	99.5636	124.064	787.886	455.975	-2.67134	8.75e-44	1.11e-40
Fstl3	97.32	20.1099	51.1826	13.4733	12.3746	5.583	10.477	56.2042	33.3406	-2.43015	0.000216415	0.00820378
Sgo2a	27.1373	29.6861	26.1358	5.77427	2.24993	7.44401	5.15607	27.6531	16.4046	-2.39457	3.33e-05	0.00158204
Kcnmb4	658.782	628.195	718.735	145.319	176.619	118.174	146.704	668.571	407.637	-2.1931	4.29e-37	4.4e-34
Dedd	483.793	461.57	512.915	121.26	114.746	84.6756	106.894	486.093	296.493	-2.18784	7.83e-35	6.42e-32
Rarb	177.796	125.448	578.255	63.517	65.2478	66.0656	64.9435	293.833	179.388	-2.17648	1.42e-05	0.00077024
Cebpzos	238.621	312.183	226.51	44.2694	66.3728	62.3436	57.6619	259.105	158.383	-2.172	3.11e-18	7.62e-16
Gtf3a	368.693	390.707	431.241	101.05	105.746	76.3011	94.3658	396.88	245.623	-2.0761	7.46e-29	3.82e-26
Mrps34	623.222	514.239	468.267	129.921	138.37	114.452	127.581	535.243	331.412	-2.07216	1.96e-31	1.34e-28
Cfap298	408.931	380.173	348.478	113.561	79.8723	81.8841	91.7724	379.194	235.483	-2.04469	2.68e-25	1.1e-22
Rab2b	719.607	874.303	873.372	187.664	213.743	201.919	201.108	822.427	511.768	-2.03285	1.18e-46	1.62e-43
Doc2a	1275.45	720.127	582.611	228.084	304.865	151.672	228.207	859.397	543.802	-1.91516	3.48e-09	3.66e-07
Rpl23a	1901.48	2003.33	2369.65	581.277	518.608	589.007	562.964	2091.49	1327.23	-1.89198	6.97e-52	1.27e-48
Nudt6	73.9258	66.0754	42.4707	17.3228	20.2493	12.0965	16.5562	60.824	38.6901	-1.88941	5.81e-06	0.000349317
Echdc1	405.188	540.095	439.953	116.448	132.746	129.34	126.178	461.745	293.961	-1.87291	1.1e-25	4.63e-23
Apex1	559.59	489.341	638.149	165.529	146.245	155.394	155.723	562.36	359.041	-1.85021	3.02e-30	1.65e-27
Prkag1	965.714	1039.01	877.728	281.015	312.74	240.069	277.941	960.818	619.38	-1.79264	5.1e-37	4.93e-34
1110065P20Rik	233.942	212.591	226.51	63.517	71.9976	59.552	65.0222	224.348	144.685	-1.79102	1.67e-19	4.73e-17
Lgi4	713.992	641.602	956.135	239.632	178.869	253.096	223.866	770.576	497.221	-1.78013	4.16e-18	1e-15
Rnf146	998.466	1205.64	1038.9	319.51	364.488	276.359	320.119	1081	700.56	-1.75825	1.3e-33	9.69e-31
Cox11	167.503	223.124	175.328	51.9685	41.6236	73.5096	55.7006	188.652	122.176	-1.75333	3.21e-10	3.77e-08
Stub1	1923.94	1847.24	1824.06	561.067	572.606	551.787	561.82	1865.08	1213.45	-1.73179	2.03e-92	6.66e-89
Gadd45gip1	325.648	429.969	365.901	100.087	123.746	114.452	112.762	373.839	243.301	-1.73137	3.42e-20	1e-17
Rpusd3	122.586	112.999	102.365	37.5328	37.1238	27.915	34.1905	112.65	73.4202	-1.72572	4.59e-10	5.23e-08
Cd1d1	84.2192	43.0927	38.1147	25.0219	11.2496	13.9575	16.743	55.1422	35.9426	-1.71589	0.000725812	0.023591
Srsf4	1187.49	1308.1	1330.75	375.328	385.862	411.281	390.824	1275.45	833.136	-1.70552	7.03e-59	1.65e-55
Ubxn6	912.375	1054.33	1107.51	288.714	379.112	278.22	315.349	1024.74	670.043	-1.70278	3.95e-27	1.85e-24
Gng13	134.751	180.989	148.103	47.1566	48.3734	47.4555	47.6618	154.614	101.138	-1.69848	5.75e-12	7.8e-10
Rab5if	565.205	612.874	679.531	165.529	199.118	209.363	191.337	619.203	405.27	-1.694	2.12e-28	1.02e-25
Hba-a1	250.786	118.744	608.747	114.523	106.871	82.8146	101.403	326.092	213.748	-1.68453	0.000548842	0.0187111
Sdhaf1	259.208	230.785	233.044	82.7646	88.8721	54.8995	75.5121	241.013	158.262	-1.68021	3.32e-13	5.04e-11
Rassf1	498.765	399.325	423.618	153.981	106.871	150.741	137.198	440.57	288.884	-1.67896	6.33e-18	1.51e-15
Rab24	777.624	829.295	809.121	258.88	263.241	234.486	252.202	805.347	528.775	-1.67656	1.04e-48	1.54e-45
Tomm40l	655.974	957.615	974.648	229.046	294.74	287.525	270.437	862.746	566.591	-1.67394	7.93e-18	1.83e-15
Rnf26	131.008	151.303	136.124	34.6456	64.1229	35.359	44.7092	139.478	92.0937	-1.65247	6.73e-08	5.84e-06
Bmyc	508.123	486.468	493.313	138.583	185.619	151.672	158.624	495.968	327.296	-1.64915	2.25e-26	1.03e-23
Kbtbd4	491.279	521.9	577.166	146.282	221.618	142.367	170.089	530.115	350.102	-1.64443	4.49e-16	8.67e-14
Mfsd9	96.3842	105.338	102.365	30.7961	38.2487	28.8455	32.6301	101.362	66.9963	-1.64194	3.29e-09	3.48e-07
Pcdhb12	95.4485	131.193	145.925	34.6456	52.8732	33.498	40.339	124.189	82.2639	-1.62879	2.53e-07	2.02e-05
Snrpf	189.025	205.887	253.735	81.8022	62.9979	70.7181	71.8394	216.216	144.028	-1.58481	2.33e-12	3.29e-10
Rell2	2012.84	2030.14	1345.99	532.196	697.477	568.536	599.403	1796.33	1197.86	-1.58468	5.85e-17	1.25e-14
Mak16	626.03	581.272	688.243	221.347	167.619	250.305	213.09	631.848	422.469	-1.56391	5.7e-19	1.59e-16
Klc3	71.1185	65.1178	59.8946	28.8714	13.4996	24.193	22.188	65.377	43.7825	-1.54805	3.28e-05	0.00156451
Clvs1	993.787	1163.5	1219.67	298.338	442.11	437.335	392.594	1125.65	759.124	-1.52026	8.66e-18	1.97e-15
Bckdha	423.904	490.299	487.869	180.927	143.995	168.421	164.448	467.357	315.902	-1.50335	9.41e-22	3.22e-19
Rtkn	1325.05	1313.85	969.203	450.393	437.61	403.837	430.614	1202.7	816.657	-1.48279	3.84e-22	1.34e-19
Mtmr11	505.315	527.646	442.131	216.535	141.745	169.351	175.877	491.697	333.787	-1.48083	5.5e-15	9.7e-13
Fzd5	121.65	75.6516	77.3185	35.608	21.3743	41.8725	32.9516	91.54	62.2458	-1.46716	8.83e-05	0.0037438
Ccdc190	272.309	283.454	334.321	120.297	89.997	115.382	108.559	296.695	202.627	-1.44501	1.12e-13	1.79e-11
Anapc15	480.05	432.842	465	168.416	191.244	148.88	169.513	459.297	314.405	-1.44169	4.36e-21	1.4e-18
Abi3	76.7331	107.253	176.417	57.7427	34.8738	40.0115	44.2094	120.134	82.1718	-1.43671	0.000245912	0.00915284
Ftl1	3086.17	2425.64	5351.31	1807.35	1036.09	1176.15	1339.86	3621.04	2480.45	-1.434	1.79e-06	0.000121282
Serf2	1147.25	1270.76	1436.38	507.174	471.359	459.667	479.4	1284.8	882.098	-1.42148	1.33e-30	7.79e-28
Smap1	2010.97	1768.71	1986.32	688.101	768.349	713.694	723.382	1922	1322.69	-1.41053	2.27e-43	2.66e-40
Lrch3	1063.03	1181.7	1011.67	390.726	390.362	452.223	411.104	1085.47	748.286	-1.39995	6.51e-31	4.05e-28
Comtd1	102.935	89.0582	99.0983	25.0219	31.499	54.8995	37.1401	97.0304	67.0852	-1.38012	9.08e-05	0.00384231
BC029722	985.365	850.362	962.669	281.977	417.361	392.671	364.003	932.799	648.401	-1.35885	6.28e-16	1.17e-13
Smarcd3	1394.3	1047.63	1399.36	471.566	506.233	520.15	499.316	1280.43	889.872	-1.35839	1.21e-20	3.81e-18
1700088E04Rik	125.393	111.083	113.255	42.3447	42.7486	52.108	45.7338	116.577	81.1555	-1.34752	7.59e-08	6.53e-06
Sdr39u1	990.044	1138.6	965.936	411.898	424.111	385.227	407.079	1031.53	719.303	-1.34272	2.46e-30	1.39e-27
Hspb6	599.828	338.038	274.426	273.316	98.9967	106.077	159.463	404.097	281.78	-1.34081	0.00153571	0.0436109
Jund	1243.64	1046.67	1087.9	417.673	399.362	548.065	455.033	1126.07	790.552	-1.30588	3.67e-17	8.04e-15
Pyroxd1	380.858	307.394	328.876	147.244	150.745	116.313	138.101	339.043	238.572	-1.29877	1.67e-12	2.44e-10
Prss23	854.357	486.468	549.941	350.306	314.99	108.869	258.055	630.256	444.155	-1.28938	0.000800212	0.0256537
Fam98c	351.849	434.757	324.52	148.206	178.869	130.27	152.449	370.375	261.412	-1.2848	8.95e-11	1.13e-08
Ccdc167	188.09	227.912	253.735	90.4636	87.7471	97.7026	91.9711	223.246	157.608	-1.27626	5.76e-10	6.48e-08
Gmpr2	291.024	378.258	357.189	136.658	149.62	139.575	141.951	342.157	242.054	-1.26991	3.95e-13	5.95e-11
Psmb8	103.87	71.8211	129.59	57.7427	31.499	37.22	42.1539	101.761	71.9572	-1.26551	0.000513727	0.0176408
Nr2f6	174.053	268.132	217.798	105.862	77.6224	93.9806	92.4882	219.995	156.241	-1.24702	3.61e-07	2.75e-05
Tex9	212.42	228.87	258.091	90.4636	111.371	93.9806	98.6052	233.127	165.866	-1.24361	1.36e-10	1.69e-08
Mien1	623.222	583.188	711.112	263.692	313.865	236.347	271.301	639.174	455.238	-1.23839	3.29e-15	5.93e-13
Rtl9	63.6323	61.2874	80.5854	27.909	21.3743	37.22	28.8344	68.5017	48.6681	-1.23745	0.000359556	0.0127882
Hypk	112.292	85.2277	78.4074	49.0813	38.2487	30.7065	39.3455	91.9758	65.6607	-1.22739	0.000119443	0.00490135
Jmjd8	548.361	670.331	688.243	245.407	278.991	294.969	273.122	635.645	454.383	-1.21808	6.88e-16	1.27e-13
Gpr153	909.568	497.002	386.592	248.294	192.369	331.258	257.307	597.721	427.514	-1.21539	0.00018295	0.00714988
Gse1	1629.17	1458.45	1201.16	677.515	517.483	651.351	615.449	1429.59	1022.52	-1.21521	3.34e-14	5.53e-12
Alyref2	43.9812	39.2622	56.6276	17.3228	22.4993	20.471	20.0977	46.6237	33.3607	-1.21437	0.00137615	0.0396978
Endog	136.622	94.8039	114.344	53.8932	44.9985	50.247	49.7129	115.257	82.4849	-1.21108	7.42e-06	0.000434885
Hddc3	204.933	262.387	224.332	74.1032	110.246	115.382	99.9105	230.551	165.231	-1.20772	2.99e-07	2.35e-05
Rbfa	468.82	447.206	519.449	245.407	203.618	174.004	207.676	478.492	343.084	-1.20379	1.95e-12	2.81e-10
Eif3d	2001.61	1543.68	1710.81	812.248	692.977	798.37	767.865	1752.03	1259.95	-1.18944	8.1e-19	2.18e-16
Tmem138	198.383	161.837	231.955	97.2003	78.7474	84.6756	86.8744	197.392	142.133	-1.18054	2.26e-07	1.81e-05
Pelo	101.063	96.7191	77.3185	43.3071	47.2484	31.637	40.7308	91.7002	66.2155	-1.1784	7.34e-05	0.00318089
Mrnip	282.602	237.489	225.421	116.448	136.12	80.0231	110.864	248.504	179.684	-1.1697	1.21e-06	8.52e-05
Kri1	837.514	763.219	866.838	363.779	355.488	380.575	366.614	822.524	594.569	-1.16449	1.04e-25	4.49e-23
Tmem198b	325.648	224.082	203.642	148.206	66.3728	123.757	112.779	251.124	181.951	-1.15197	0.000403289	0.0142663
Micall1	1748.95	1530.27	1368.86	745.844	511.858	852.339	703.347	1549.36	1126.35	-1.13832	5.21e-09	5.38e-07
Tmem202	51.4673	60.3297	46.8267	26.9466	25.8741	19.5405	24.1204	52.8746	38.4975	-1.13753	0.00120121	0.0355896
Bnip3	2580.85	2467.77	1666.16	959.492	1325.21	796.509	1027.07	2238.26	1632.67	-1.12475	6.02e-07	4.52e-05
Cnbd2	93.5769	115.871	99.0983	51.0061	59.623	32.5675	47.7322	102.849	75.2905	-1.1146	0.000280475	0.0102429
Irs1	331.262	510.409	324.52	139.545	176.619	223.32	179.828	388.73	284.279	-1.11206	1.46e-05	0.000785676
Raf1	1747.08	1897.99	1881.78	886.351	860.596	815.119	854.022	1842.28	1348.15	-1.10921	3.44e-35	3.14e-32
Pkn1	909.568	998.792	1367.77	574.54	547.857	403.837	508.745	1092.04	800.395	-1.10206	3.73e-08	3.39e-06
Pdlim4	397.702	337.08	282.049	205.949	85.4972	183.309	158.252	338.944	248.598	-1.09606	0.000493827	0.0170287
Hbegf	830.027	498.917	547.763	423.447	145.12	308.926	292.498	625.569	459.034	-1.09541	0.00171988	0.0479289
Rarres2	143.173	100.55	121.967	54.8556	53.9982	62.3436	57.0658	121.896	89.4811	-1.09346	2.35e-05	0.00118775
Podxl2	4327.93	4166.58	2098.49	1500.35	1673.94	1825.64	1666.65	3531	2598.82	-1.08329	1.74e-05	0.000914101
Glyctk	93.5769	67.0331	75.1405	43.3071	42.7486	26.054	37.3699	78.5835	57.9767	-1.07801	0.0012752	0.0371779
Mrpl43	433.261	456.782	521.627	249.256	220.493	200.988	223.579	470.557	347.068	-1.0727	3.77e-12	5.19e-10
Ccdc106	515.609	497.96	588.056	204.024	294.74	264.262	254.342	533.875	394.109	-1.07114	6.71e-10	7.4e-08
Ptgr2	903.017	858.023	908.22	428.259	402.737	443.849	424.948	889.753	657.351	-1.06455	7.14e-26	3.17e-23
Lrrc24	314.419	383.046	329.965	127.034	197.993	167.49	164.173	342.476	253.324	-1.0639	2.24e-07	1.8e-05
Ost4	297.575	370.597	462.822	207.874	142.87	189.822	180.189	376.998	278.593	-1.06144	3.34e-06	0.000214998
Tvp23a	900.21	796.736	787.341	382.065	446.61	374.992	401.222	828.096	614.659	-1.04786	8.8e-17	1.83e-14
Rpl22l1	539.003	512.324	461.733	235.783	212.618	285.664	244.688	504.353	374.521	-1.04152	7.13e-11	9.08e-09
Pex14	819.734	688.525	657.751	340.682	388.112	325.675	351.49	722.004	536.747	-1.04092	2.89e-13	4.44e-11
Toe1	278.859	246.107	291.85	144.357	140.62	112.591	132.523	272.272	202.397	-1.04015	1.43e-08	1.37e-06
Kctd10	1144.45	938.463	1185.91	615.923	429.736	549.926	531.861	1089.61	810.734	-1.03303	5.29e-10	5.99e-08
Bhlhe41	1311.95	1440.25	716.557	588.976	453.36	660.656	567.664	1156.25	861.958	-1.02615	6.87e-05	0.00302258
Syt6	932.026	661.712	924.554	570.691	305.99	359.173	411.951	839.431	625.691	-1.02581	3.25e-05	0.00155889
Pdxk	4462.68	4450.99	4028.18	1823.71	2085.68	2460.24	2123.21	4313.95	3218.58	-1.02271	4.98e-14	8.1e-12
S1pr3	808.505	328.462	549.941	327.209	201.368	304.274	277.617	562.303	419.96	-1.01729	0.00143987	0.0413183
Gpr83	779.496	531.476	898.419	406.124	357.738	330.328	364.73	736.464	550.597	-1.01319	1.06e-06	7.62e-05
Prodh	276.988	367.724	370.257	562.992	826.848	653.212	681.017	338.323	509.67	1.00916	1.61e-07	1.34e-05
Jdp2	359.335	534.349	551.03	755.468	1425.33	749.053	976.616	481.572	729.094	1.01974	0.000219972	0.00831941
Rxfp1	153.466	225.04	257.002	301.225	424.111	566.675	430.67	211.836	321.253	1.02524	0.000239293	0.00893106
Lhx2	320.033	475.935	424.707	636.133	1025.97	833.729	831.942	406.892	619.417	1.03154	1.78e-06	0.000121282
Rtbdn	29.0089	27.7708	30.4918	48.119	69.7477	61.413	59.7599	29.0905	44.4252	1.03685	0.00172461	0.0479792
Pgr	298.51	365.809	333.232	581.277	943.844	533.177	686.099	332.517	509.308	1.04382	6.38e-06	0.000379268
Myo5c	71.1185	93.8463	57.7166	199.212	151.87	110.73	153.937	74.2271	114.082	1.04955	0.000782514	0.0251847
Adra1d	123.522	217.379	109.988	224.234	348.738	365.687	312.887	150.296	231.591	1.05614	0.000668756	0.0221757
Phykpl	133.815	103.422	101.276	267.541	174.369	265.193	235.701	112.838	174.27	1.06335	1.58e-05	0.0008431
Alox12b	62.6965	91.931	63.1616	111.636	239.617	129.34	160.198	72.5964	116.397	1.13796	0.00141051	0.0406178
Col8a1	102.935	80.4397	88.2084	304.112	184.494	116.313	201.639	90.5276	146.083	1.155	0.00119268	0.0354008
Chrnb1	31.8162	23.9404	26.1358	76.028	70.8726	41.8725	62.9244	27.2974	45.1109	1.20089	0.00157322	0.0444455
Enpp2	4755.58	4884.79	2990.37	14782.1	8569.97	5992.42	9781.51	4210.25	6995.88	1.21609	0.000130629	0.00528116
Gsdme	189.961	236.531	184.04	441.732	501.733	492.235	478.567	203.511	341.039	1.23185	4.11e-15	7.33e-13
Il17d	43.0454	82.3549	79.4964	137.62	204.743	148.88	163.748	68.2989	116.023	1.26239	7.04e-05	0.00308064
Polq	75.7973	32.5589	50.0936	117.41	146.245	120.035	127.897	52.8166	90.3566	1.27303	0.000184691	0.00720077
Fmod	99.1916	87.143	138.302	123.185	313.865	348.938	261.996	108.212	185.104	1.27685	0.000922685	0.0289026
Espn	75.7973	47.8808	26.1358	102.012	165.37	120.965	129.449	49.938	89.6934	1.36691	0.000708791	0.023208
Ovol2	72.99	58.4145	46.8267	161.68	232.867	68.8571	154.468	59.4104	106.939	1.37432	0.00167882	0.0470243
Stab2	25.2658	29.6861	15.2459	64.4794	43.8735	76.3011	61.5513	23.3992	42.4753	1.39207	0.000627343	0.0209378
Elmo3	25.2658	30.6437	43.5597	90.4636	68.6227	100.494	86.5268	33.1564	59.8416	1.39405	3.81e-05	0.00178864
Traf3ip2	82.3477	51.7112	38.1147	102.012	114.746	241	152.586	57.3912	104.989	1.40894	0.0010186	0.0310391
Fbxo7	474.435	525.731	447.576	1192.39	1738.07	1008.66	1313.04	482.581	897.81	1.44303	1.74e-12	2.53e-10
Cilp2	15.9081	10.5338	27.2248	55.818	34.8738	55.83	48.8406	17.8889	33.3648	1.46335	0.00178027	0.0493604
1700029I15Rik	14.9723	16.2795	22.8688	43.3071	43.8735	66.0656	51.0821	18.0402	34.5611	1.51202	0.000207843	0.00795231
Amigo3	28.0731	13.4066	33.7588	71.2161	69.7477	75.3706	72.1114	25.0795	48.5955	1.53089	7.57e-05	0.00327043
Slc46a1	60.825	95.7615	138.302	277.165	313.865	284.733	291.921	98.2962	195.109	1.57481	3.95e-08	3.57e-06
Kif20a	13.1008	19.1523	18.5129	46.1942	65.2478	40.942	50.7947	16.922	33.8583	1.58438	0.000104613	0.00435818
Wnt2b	24.33	60.3297	44.6487	172.266	122.621	96.7721	130.553	43.1028	86.8279	1.60019	4.49e-05	0.00208652
Kirrel2	40.2381	92.8887	69.6955	167.454	298.115	158.185	207.918	67.6074	137.763	1.61977	1.71e-05	0.000906803
Tk1	7.48616	7.66092	17.4239	39.4575	26.9991	36.2895	34.2487	10.857	22.5529	1.6779	0.00105056	0.0316983
Ptgis	50.5315	21.0675	21.7798	141.47	114.746	59.552	105.256	31.1263	68.1911	1.75219	0.000237251	0.00889095
Kif22	49.5958	24.898	47.9157	127.996	155.245	129.34	137.527	40.8031	89.1651	1.75431	2.45e-08	2.26e-06
Pkd1l3	15.9081	14.3642	37.0257	82.7646	88.8721	59.552	77.0629	22.4327	49.7478	1.79138	5.09e-05	0.00230659
P2rx6	57.0819	67.9907	34.8478	224.234	212.618	120.035	185.629	53.3068	119.468	1.79454	3.11e-07	2.42e-05
Tymp	9.35769	10.5338	3.26698	29.8338	33.7489	19.5405	27.7077	7.71948	17.7136	1.82279	0.00155282	0.0440207
Pqlc3	27.1373	38.3046	43.5597	158.793	132.746	98.6331	130.057	36.3339	83.1955	1.84409	8.31e-09	8.22e-07
Prox2	29.0089	17.2371	18.5129	84.6894	101.247	49.3165	78.4175	21.5863	50.0019	1.85379	1.06e-05	0.000595593
4933402D24Rik	13.1008	5.74569	5.44496	22.1347	38.2487	28.8455	29.743	8.09714	18.9201	1.86089	0.000946668	0.0294064
Dnah7c	25.2658	32.5589	35.9367	99.125	166.494	81.8841	115.835	31.2538	73.5442	1.88947	4.14e-07	3.15e-05
Dnah17	14.0365	6.70331	11.9789	51.0061	33.7489	38.1505	40.9685	10.9063	25.9374	1.91311	5.17e-05	0.00233104
Nusap1	30.8804	9.57615	21.7798	53.8932	104.622	80.0231	79.5126	20.7455	50.129	1.93573	5.25e-05	0.00236033
Star	55.2104	48.8384	44.6487	199.212	193.494	198.197	196.968	49.5658	123.267	1.98718	1.47e-20	4.55e-18
Slc16a4	18.7154	23.9404	25.0468	85.6517	95.6218	90.2586	90.5107	22.5675	56.5391	2.00742	7.12e-11	9.08e-09
Vsig2	98.2558	96.7191	67.5175	360.892	510.733	193.544	355.056	87.4975	221.277	2.01744	8.72e-09	8.52e-07
Trpv6	48.66	51.7112	22.8688	166.492	231.742	108.869	169.034	41.08	105.057	2.03305	3.31e-07	2.56e-05
Tnfsf8	13.1008	17.2371	18.5129	97.2003	67.4978	44.664	69.7874	16.2836	43.0355	2.10321	1.56e-06	0.000107533
Matn1	20.5869	12.449	5.44496	46.1942	68.6227	55.83	56.8823	12.827	34.8546	2.13098	1.48e-05	0.000794402
Napsa	7.48616	2.87285	8.71194	34.6456	24.7492	32.5675	30.6541	6.35698	18.5055	2.28423	4.52e-05	0.00209469
Serpina3f	17.7796	7.66092	4.35597	23.0971	80.9973	42.803	48.9658	9.93217	29.449	2.28565	0.000584726	0.0197078
C8g	8.42192	18.1947	7.62295	64.4794	61.8729	50.247	58.8665	11.4132	35.1398	2.3574	1.71e-07	1.41e-05
Gm6569	5.61462	1.91523	4.35597	29.8338	11.2496	20.471	20.5181	3.96194	12.24	2.37962	0.000930324	0.0290311
Krtcap3	10.2935	11.4914	9.80093	56.7804	64.1229	56.7605	59.2213	10.5286	34.8749	2.48778	4.2e-10	4.82e-08
Exoc3l	24.33	20.1099	21.7798	123.185	145.12	104.216	124.174	22.0733	73.1234	2.48845	5.96e-16	1.13e-13
Ccdc125	6.55039	10.5338	10.8899	75.0656	62.9979	27.915	55.3262	9.32469	32.3254	2.57256	2.17e-06	0.0001435
Acsbg3	3.74308	3.83046	2.17798	25.0219	19.1244	15.8185	19.9882	3.25051	11.6194	2.60608	0.00012667	0.00513371
Adcy10	6.55039	5.74569	3.26698	39.4575	34.8738	28.8455	34.3923	5.18768	19.79	2.71186	7.26e-07	5.37e-05
1700003F12Rik	7.48616	4.78808	2.17798	31.7585	51.7483	16.749	33.4186	4.8174	19.118	2.76946	5.64e-05	0.00251527
Naaladl1	0	1.91523	5.44496	12.5109	19.1244	17.6795	16.4383	2.4534	9.44583	2.79388	0.00115134	0.0342977
Spata9	10.2935	2.87285	1.08899	23.0971	46.1235	33.498	34.2395	4.75177	19.4956	2.81939	8.29e-05	0.00354981
Clic3	3.74308	8.61854	1.08899	43.3071	15.7495	42.803	33.9532	4.48354	19.2184	2.90527	8.36e-05	0.00356367
Ltf	5.61462	3.83046	3.26698	47.1566	12.3746	40.942	33.4911	4.23735	18.8642	2.97959	3.06e-05	0.00148635
Perm1	13.1008	7.66092	8.71194	95.2755	70.8726	75.3706	80.5062	9.82454	45.1654	3.02947	1.39e-13	2.19e-11
Tmem253	2.80731	0.957615	4.35597	27.909	15.7495	22.332	21.9968	2.70696	12.3519	3.05177	3.61e-05	0.00170246
Pkd2l2	18.7154	29.6861	38.1147	239.632	272.241	227.973	246.615	28.8387	137.727	3.10698	3.21e-29	1.7e-26
Asb14	1.87154	0	5.44496	25.0219	25.8741	14.888	21.928	2.43883	12.1834	3.21449	0.000112199	0.00464182
H2-T24	12.165	11.4914	25.0468	152.056	156.37	145.158	151.195	16.2344	83.7145	3.23925	1.65e-21	5.53e-19
Cdiptos	5.61462	2.87285	2.17798	46.1942	39.3737	21.4015	35.6565	3.55515	19.6058	3.30531	6.18e-07	4.61e-05
Fbxw15	1.87154	2.87285	0	11.5485	7.87474	28.8455	16.0896	1.58146	8.83553	3.31553	0.000904925	0.0284005
Slc24a5	6.55039	14.3642	4.35597	96.2379	83.2472	86.5366	88.6739	8.42353	48.5487	3.38035	2.35e-14	3.97e-12
Syna	0.935769	19.1523	6.53395	92.3884	103.497	93.9806	96.6218	8.87401	52.7479	3.44226	6.49e-08	5.67e-06
Gm14137	6.55039	3.83046	2.17798	47.1566	42.7486	54.8995	48.2682	4.18628	26.2273	3.50424	2.9e-10	3.47e-08
Ankrd61	5.61462	0.957615	1.08899	40.4199	25.8741	23.2625	29.8522	2.55374	16.203	3.5169	3.31e-06	0.000213721
Cabyr	61.7608	23.9404	15.2459	294.488	734.601	197.266	408.785	33.649	221.217	3.59956	5.45e-06	0.000331524
4931422A03Rik	0.935769	1.91523	0	18.2852	11.2496	6.51351	12.0161	0.950333	6.48322	3.6152	0.00111732	0.0334665
Ciita	4.67885	1.91523	3.26698	41.3823	44.9985	36.2895	40.8901	3.28702	22.0886	3.63115	1.8e-09	1.94e-07
Ccdc38	1.87154	2.87285	0	21.1723	22.4993	17.6795	20.4504	1.58146	11.0159	3.64306	1.45e-05	0.000784471
Ccdc27	1.87154	0.957615	3.26698	37.5328	21.3743	18.61	25.839	2.03204	13.9355	3.69766	3.74e-06	0.000238794
4930562C15Rik	1.87154	0.957615	0	16.3604	14.6245	8.37451	13.1198	0.943051	7.03144	3.73956	0.000446425	0.0156239
Tas1r1	8.42192	3.83046	1.08899	75.0656	48.3734	75.3706	66.2698	4.44713	35.3585	3.86468	2.81e-11	3.72e-09
Sds	0	0.957615	3.26698	12.5109	14.6245	31.637	19.5908	1.4082	10.4995	3.86798	9.89e-05	0.00413613
Epyc	0.935769	0.957615	1.08899	6.73665	24.7492	13.027	14.8376	0.994126	7.91587	3.89533	0.000359945	0.0127882
Tex50	0	1.91523	3.26698	25.0219	28.1241	21.4015	24.8491	1.7274	13.2883	3.89604	2.18e-06	0.0001435
Cabp4	1.87154	0	2.17798	20.21	28.1241	16.749	21.6943	1.34984	11.5221	4.02767	9.08e-06	0.000519873
Myh6	5.61462	3.83046	0	66.4042	32.6239	59.552	52.86	3.14836	28.0042	4.02873	3.96e-09	4.14e-07
Krt23	0.935769	1.91523	0	21.1723	21.3743	9.30501	17.2839	0.950333	9.11711	4.13338	9.17e-05	0.00385918
Mst1	0	0	2.17798	5.77427	20.2493	13.027	13.0169	0.725995	6.87143	4.26462	0.000947727	0.0294064
Ghrl	0.935769	3.83046	2.17798	39.4575	47.2484	48.386	45.0307	2.31474	23.6727	4.28411	2.1e-10	2.54e-08
Cfap157	0.935769	3.83046	1.08899	46.1942	38.2487	34.4285	39.6238	1.95174	20.7878	4.32693	3.25e-09	3.46e-07
Itgbl1	5.61462	5.74569	26.1358	187.664	291.365	267.984	249.004	12.4987	130.752	4.34419	1.41e-18	3.61e-16
Ngp	0.935769	9.57615	0	106.824	31.499	96.7721	78.365	3.50397	40.9345	4.46267	2.95e-07	2.32e-05
Opn4	0	0.957615	0	5.77427	6.74978	11.166	7.89669	0.319205	4.10795	4.4782	0.00161401	0.0453635
Cysrt1	0	2.87285	0	16.3604	34.8738	23.2625	24.8323	0.957615	12.8949	4.65343	7.7e-06	0.000449593
Mroh2a	0.935769	5.74569	3.26698	83.727	96.7468	69.7876	83.4204	3.31615	43.3683	4.65663	4.8e-16	9.15e-14
Mkrn2os	0.935769	2.87285	0	26.9466	37.1238	41.8725	35.3143	1.26954	18.2919	4.75042	4.17e-08	3.72e-06
Cpsf4l	2.80731	0	5.44496	51.9685	91.122	75.3706	72.8203	2.75076	37.7855	4.76955	8.12e-13	1.21e-10
Gm50092	0.935769	0	0	15.3981	6.74978	8.37451	10.1741	0.311923	5.24302	4.84432	0.000550665	0.0187135
Hao2	0	0	0	4.8119	5.62481	5.583	5.3399	0	2.66995	4.87034	0.00108959	0.0327555
Tshb	1.87154	0	1.08899	28.8714	22.4993	37.22	29.5302	0.986844	15.2585	4.90361	4.53e-07	3.41e-05
Tnfrsf18	3.74308	0.957615	4.35597	96.2379	94.4969	78.1621	89.6323	3.01889	46.3256	4.9113	1.13e-17	2.54e-15
Fcer2a	1.87154	0.957615	0	16.3604	48.3734	24.193	29.6423	0.943051	15.2927	4.91195	2.34e-06	0.000153756
Gm6588	0	0	0	4.8119	4.49985	7.44401	5.58525	0	2.79263	4.94114	0.000968382	0.0299341
Ell3	0	0	1.08899	9.62379	11.2496	12.0965	10.99	0.362997	5.67649	4.9507	0.000262277	0.00971785
Gm13547	0	0	0	4.8119	5.62481	6.51351	5.65007	0	2.82504	4.95343	0.000838911	0.0267897
Olfr461	0	0	0	8.66141	2.24993	6.51351	5.80828	0	2.90414	5.00263	0.00129447	0.0375397
Prss52	0	0	0	4.8119	8.9997	4.6525	6.1547	0	3.07735	5.06675	0.000688736	0.0227922
H2-M10.2	0	0	1.08899	10.5862	8.9997	16.749	12.1116	0.362997	6.23731	5.09644	0.000190861	0.00738865
Pcp2	0	0	0	3.84952	14.6245	2.7915	7.08851	0	3.54426	5.26565	0.00100781	0.031036
Vmn2r118	0	0	0	2.88714	7.87474	11.166	7.30929	0	3.65465	5.32459	0.000460125	0.0160691
Trpm5	0	0	0	7.69903	3.37489	11.166	7.41331	0	3.70665	5.35427	0.000352992	0.0125957
Pter	43.9812	31.6013	38.1147	1269.38	1743.69	1710.26	1574.44	37.8991	806.171	5.37547	1.37e-141	1.13e-137
Olfr543	0	0	0	8.66141	8.9997	5.583	7.74804	0	3.87402	5.40432	0.000167938	0.00664225
Krt20	0.935769	0.957615	3.26698	64.4794	107.996	40.942	71.1393	1.72012	36.4297	5.41395	2.12e-11	2.83e-09
Ccdc73	0.935769	10.5338	2.17798	180.927	210.368	212.154	201.15	4.54917	102.849	5.44886	7.75e-29	3.85e-26
1700020A23Rik	0	0	0	4.8119	10.1247	9.30501	8.08052	0	4.04026	5.46518	0.000159957	0.00638815
Cd27	0	0	0	4.8119	7.87474	12.0965	8.26105	0	4.13052	5.50298	0.00016056	0.00639669
Olfr545	0	0	0	3.84952	10.1247	11.166	8.38006	0	4.19003	5.51932	0.000179314	0.00704131
1700067K01Rik	0	0.957615	0	25.9842	16.8744	8.37451	17.0777	0.319205	8.69847	5.58563	4.82e-05	0.00221049
Gcnt7	0	0	0	7.69903	11.2496	8.37451	9.10772	0	4.55386	5.63707	6.05e-05	0.00267726
Pzp	0	0	0	11.5485	11.2496	4.6525	9.15023	0	4.57511	5.64331	9.68e-05	0.00406496
Dcst1	4.67885	1.91523	2.17798	161.68	172.119	116.313	150.037	2.92402	76.4806	5.66083	9.79e-24	3.65e-21
Fam83c	0	0	0	14.4357	6.74978	6.51351	9.23299	0	4.61649	5.66435	8.81e-05	0.0037438
Gp1ba	0.935769	0	0	20.21	12.3746	21.4015	17.9954	0.311923	9.15364	5.66737	1.83e-05	0.000954395
mt-Nd6	341.556	466.359	383.325	20226.3	22449.8	18389.5	20355.2	397.08	10376.1	5.6797	2.79e-290	4.57e-286
Slc10a1	0	0	0	7.69903	11.2496	9.30501	9.41789	0	4.70894	5.68637	4.83e-05	0.00221049
Gm16253	0.935769	0	0	15.3981	23.6242	16.749	18.5904	0.311923	9.45118	5.70465	1.4e-05	0.000763854
A530032D15Rik	0	0	0	13.4733	6.74978	8.37451	9.53253	0	4.76627	5.71155	5.74e-05	0.00255214
Gapdhs	0	0.957615	2.17798	51.0061	48.3734	62.3436	53.9077	1.0452	27.4764	5.76201	3.2e-10	3.77e-08
1700018G05Rik	0	0	0	6.73665	16.8744	6.51351	10.0415	0	5.02077	5.77214	7.12e-05	0.00309296
Slc16a5	0	0	2.17798	35.608	37.1238	36.2895	36.3404	0.725995	18.5332	5.77234	1.88e-07	1.53e-05
En1	0.935769	0	0	16.3604	0	41.8725	19.411	0.311923	9.86146	5.77533	0.00103918	0.0314464
Mip	0	0	0	11.5485	10.1247	10.2355	10.6362	0	5.31812	5.86606	2e-05	0.00102775
Gm5415	0	0.957615	0	15.3981	35.9988	11.166	20.8543	0.319205	10.5867	5.86695	1.96e-05	0.00101422
Fam24a	0	0	0	19.2476	11.2496	1.861	10.7861	0	5.39304	5.88378	0.000206239	0.00790936
Ccdc188	0	0	1.08899	23.0971	21.3743	19.5405	21.3373	0.362997	10.8501	5.90764	4.76e-06	0.000296021
Olfr692	0	0	0	5.77427	19.1244	8.37451	11.091	0	5.54552	5.91626	4.83e-05	0.00221049
Gm11100	0	0	0	13.4733	10.1247	11.166	11.588	0	5.794	5.991	1.19e-05	0.000660323
1700001K19Rik	0	0	2.17798	34.6456	46.1235	48.386	43.0517	0.725995	21.8889	6.01651	5.48e-08	4.81e-06
Olfr1417	0	0	0	10.5862	13.4996	17.6795	13.9217	0	6.96087	6.255	4.01e-06	0.000254167
Igf2bp3	3.74308	0	1.08899	121.26	148.495	117.243	128.999	1.61069	65.305	6.29054	6.61e-19	1.81e-16
Stap1	0	0.957615	1.08899	58.7051	60.748	40.0115	53.1549	0.682202	26.9185	6.32654	8.44e-09	8.3e-07
Galr2	0	0	0	10.5862	15.7495	18.61	14.9819	0	7.49094	6.35955	2.54e-06	0.000165962
Fam205c	0	3.83046	4.35597	230.009	330.739	97.7026	219.483	2.72881	111.106	6.36179	1.11e-19	3.18e-17
4933428G20Rik	1.87154	0	0	49.0813	50.6233	63.2741	54.3262	0.623846	27.475	6.36952	5.9e-09	5.98e-07
Spata46	0	0	0	19.2476	17.9994	8.37451	15.2072	0	7.60358	6.37759	3.56e-06	0.000228247
Pof1b	0	0	0	14.4357	13.4996	18.61	15.5151	0	7.75754	6.41269	1.57e-06	0.000107533
Cd160	0.935769	0	0	13.4733	50.6233	27.915	30.6705	0.311923	15.4912	6.42639	2.07e-06	0.000137867
Gm35549	0	0	0	18.2852	6.74978	23.2625	16.0992	0	8.04958	6.47035	4.22e-06	0.000266536
Slc23a1	0	0	0	8.66141	25.8741	14.888	16.4745	0	8.23726	6.49001	3.03e-06	0.000196839
Il12rb2	0	0	0	15.3981	25.8741	12.0965	17.7896	0	8.89479	6.60083	1.05e-06	7.59e-05
Cyp2t4	0.935769	0	0	29.8338	41.6236	32.5675	34.675	0.311923	17.4934	6.60563	1.76e-07	1.44e-05
Ccdc7b	0	0	0	25.0219	24.7492	13.027	20.9327	0	10.4663	6.83893	2.75e-07	2.18e-05
Ankrd53	0	0	0	32.7209	22.4993	15.8185	23.6796	0	11.8398	7.0198	1.1e-07	9.39e-06
Zbtb32	0.935769	0	0	52.9309	48.3734	38.1505	46.4849	0.311923	23.3984	7.03039	1.82e-08	1.71e-06
Actl10	0.935769	0	0	43.3071	73.1226	28.8455	48.4251	0.311923	24.3685	7.08586	4.15e-08	3.72e-06
Meioc	0	0	0	27.909	39.3737	18.61	28.6309	0	14.3155	7.28914	2.56e-08	2.35e-06
Tmem210	0	0	0	22.1347	73.1226	13.9575	36.4049	0	18.2025	7.63523	7.22e-08	6.23e-06
Lrrc26	0	0	0	42.3447	57.3731	25.1235	41.6138	0	20.8069	7.82946	1.39e-09	1.51e-07
Ccdc183	0	0	0	54.8556	59.623	27.915	47.4646	0	23.7323	8.02042	4.19e-10	4.82e-08
Hipk4	5.61462	6.70331	3.26698	1127.91	2230.8	855.13	1404.61	5.19497	704.904	8.06648	5.87e-39	6.42e-36
Fndc8	0	0	0	54.8556	69.7477	40.0115	54.8716	0	27.4358	8.2293	5.87e-11	7.59e-09
Dnase1	0	0	0	106.824	127.121	158.185	130.71	0	65.355	9.48522	6.85e-15	1.2e-12
Slc30a2	0	0	0	138.583	219.368	71.6486	143.2	0	71.5998	9.61426	3.91e-14	6.42e-12
Fer1l5	0	0	1.08899	294.488	287.99	320.092	300.857	0.362997	150.61	9.7261	3.52e-16	6.87e-14
Il4	0	0	0	203.062	265.491	240.069	236.207	0	118.104	10.3374	7.34e-18	1.72e-15
Proz	0	0	0	249.256	327.364	225.181	267.267	0	133.634	10.515	2.54e-18	6.31e-16
Gm14597	0	0	0	211.723	373.488	321.023	302.078	0	151.039	10.6923	1.2e-18	3.12e-16
Klhl34	0	0	0	819.947	1303.83	750.914	958.231	0	479.115	12.3579	1e-24	3.91e-22
