# Supplementary material for: Effect of Celastrol on LncRNAs and mRNAs Profiles of Cerebral Ischemia-Reperfusion Injury in Transient Middle Cerebral Artery Occlusion Mice Model
Source: Front Neurosci. 2022 May 23;16:889292. doi: 10.3389/fnins.2022.889292 (PMC9169531; doi:10.3389/fnins.2022.889292)
Supplement: Supplementary file 6 [file Table_6.XLSX]

## Sheet: Sheet1
gene_name	log2FoldChange	pvalue	padj
A830018L16Rik	0.45898	0.0337495	0.368327
Crispld1	1.37885	0.00390254	0.0917711
Paqr8	0.44262	0.0121075	0.203358
Rims1	0.503867	0.00572844	0.122001
Col19a1	0.757678	0.0217138	0.291422
Tsga10	0.576217	0.020283	0.280713
Npas2	0.580947	0.0481265	0.447309
Myo1b	0.45123	0.00391132	0.0918462
Cdk5r2	0.639887	0.0250754	0.316362
Sh3bp4	0.449455	0.0496284	0.452905
Per2	0.686806	0.019868	0.278968
Serpinb8	0.99271	0.0336882	0.368327
R3hdm1	0.453594	0.0132719	0.216545
Prelp	0.909505	5.108e-09	5.3065e-07
Fmod	1.27685	0.000922685	0.0289026
Shisa4	0.411426	0.000557522	0.0189074
Glul	0.42324	0.0182507	0.263936
Rasal2	0.321535	0.0316645	0.357702
Sft2d2	0.389853	0.0232285	0.302117
Mgst3	0.534699	0.0441896	0.42767
Kcnj9	0.518777	0.0458037	0.434829
Ppp2r5a	0.274467	0.0162849	0.245229
Cd34	1.19914	0.0166331	0.249102
1110008P14Rik	0.479721	0.00740612	0.146111
Lhx2	1.03154	1.78295e-06	0.000121282
Kcnj3	0.482519	0.0345206	0.372879
Slc38a11	1.13885	0.0357191	0.379724
Csrnp3	0.208762	0.0047588	0.106563
Rbm45	0.304387	0.0288519	0.339968
Slc1a2	0.308664	0.0293591	0.343234
Fmn1	0.574966	0.00767185	0.15009
Zfp770	0.242299	0.0249022	0.315698
Adra1d	1.05614	0.000668756	0.0221757
Acss1	0.617826	0.00872448	0.164409
Dusp15	0.586765	0.00121161	0.0357687
D630003M21Rik	0.539629	0.0249137	0.315698
Elmo2	0.200446	0.0128205	0.210668
Zmynd8	0.392473	0.0100191	0.179731
Ncoa3	0.296068	0.00641937	0.132948
Phactr3	0.470501	0.0253775	0.318217
Maob	0.503571	0.0223278	0.295317
Gria3	0.590286	0.0455426	0.434109
Prrg3	0.380677	0.0157664	0.242312
Frmpd4	0.346158	0.0284897	0.33691
Zmat3	0.45503	0.00432225	0.0988097
Rxfp1	1.02524	0.000239293	0.00893106
Fbxw7	0.42029	0.0184818	0.266517
Bcan	0.448026	0.0252903	0.317609
Rusc1	0.390553	0.0329944	0.365037
Itga10	0.813525	0.010232	0.181055
Pde4dip	0.257783	0.0446855	0.430594
Phtf1	0.328295	0.016883	0.250687
Magi3	0.32598	0.0305856	0.349553
Slc16a4	2.00742	7.12016e-11	9.07619e-09
Palmd	0.533394	0.0127089	0.209653
Pde5a	0.464304	0.0252798	0.317609
Ddit4l	1.07778	0.00723966	0.144686
Col24a1	0.716583	0.031361	0.355743
Tmem64	0.310422	0.0152869	0.237845
Calb1	0.764585	0.0158745	0.243241
Myorg	0.988278	0.00493133	0.109679
Cntfr	0.265392	0.0341023	0.370209
Unc13b	0.313401	0.0296282	0.344079
Pax5	2.84422	0.0101483	0.18008
Whrn	0.407783	0.0399589	0.402283
Brinp1	0.413863	0.0335452	0.368159
Ptprd	0.372171	0.0167185	0.249785
Mpdz	0.372469	0.0259111	0.322355
Snapc3	0.506072	0.0441154	0.427456
Cyp2j9	0.526768	0.00388305	0.0914439
Zyg11b	0.220591	0.0426072	0.416779
Eps15	0.336389	0.00740478	0.146111
Elavl4	0.333214	0.0272098	0.330097
Hivep3	0.304408	0.0220878	0.293509
Cited4	1.39049	0.0358698	0.381079
Kpna6	0.229495	0.0347128	0.373624
Klhdc7a	0.955522	0.000290919	0.0105645
Crocc	0.346542	0.0185429	0.266517
Fbxo42	0.241864	0.0270067	0.328362
Fv1	0.637697	0.0379834	0.392854
Mib2	0.210092	0.0346483	0.373459
Slc30a3	1.00835	0.0372512	0.389425
Gtf3c2	0.260489	0.0428746	0.418148
Ift172	0.381007	0.0119629	0.201601
Slit2	0.303322	0.0354166	0.378716
Tbc1d19	0.275745	0.0418268	0.412946
Arap2	0.331049	0.0175434	0.257564
Tmem33	0.166601	0.0370265	0.387932
Cwh43	1.16262	0.0135163	0.218784
Parm1	0.43823	0.00840472	0.159486
Ccni	0.320913	0.0213676	0.289141
Coq2	0.248304	0.0457832	0.434829
Nkx6-1	2.43863	0.0141906	0.225701
Btbd8	0.413789	0.0234257	0.303241
Pigg	0.297601	0.0205297	0.28246
Gm42517	0.611928	0.0107187	0.18587
Galnt9	0.72421	0.00128418	0.0373071
2900026A02Rik	0.506285	0.000345665	0.0123881
Selplg	0.778863	0.012038	0.202466
Tpcn1	0.359942	0.0179853	0.261249
Hectd4	0.260261	0.0269078	0.327707
Clip1	0.224697	0.0105083	0.183687
Pitpnm2	0.515314	0.0234725	0.303607
Tmem132b	0.328586	0.00867943	0.16394
Mmp17	0.574163	0.0105439	0.184115
Srrm3	0.286176	0.0470822	0.441248
Map11	0.224044	0.0448625	0.431131
Ttyh3	0.269302	0.0159513	0.243241
Lmtk2	0.427428	0.0243267	0.310255
Mtus2	0.449327	0.0155543	0.239951
Aass	0.914377	0.00823003	0.157079
Lrrc4	0.388073	0.0451445	0.432507
Mest	0.612132	0.00903701	0.167419
Dennd11	0.229993	0.0423831	0.415774
1700003E16Rik	0.587771	0.0010403	0.0314464
Arhgap25	0.82445	0.0336695	0.368327
Ttll3	0.769559	0.00101486	0.0310391
Myadm	0.530871	2.83114e-05	0.00137894
Ttyh1	0.307186	0.0325867	0.363615
Sptbn4	0.336305	0.0306041	0.349553
Akt2	0.367504	0.0489164	0.450316
Kirrel2	1.61977	1.71262e-05	0.000906803
Fxyd7	0.54994	0.00687167	0.13994
Shank1	0.540612	0.00466949	0.105221
Ppfia3	0.375292	0.0166645	0.249344
Herc2	0.32104	0.0185337	0.266517
Apba2	0.362532	0.0200703	0.279419
Tmem126a	0.476009	0.00367556	0.0876899
Pgm2l1	0.382501	0.0262731	0.324384
Clpb	0.350079	0.00562899	0.120777
Olfr78	1.91414	0.0379226	0.392473
Cckbr	0.768584	0.0262508	0.324384
Mical2	0.576621	5.28807e-08	4.66658e-06
Usp31	0.352513	0.0037182	0.0879403
Cacng3	0.646299	0.0370349	0.387932
Tufm	0.346634	0.0360009	0.381977
Taok2	0.223052	0.0438928	0.425801
Sez6l2	0.542192	0.00340064	0.0826768
Dusp8	0.231358	0.0310304	0.352724
Tnni2	2.75961	0.0159404	0.243241
Igf2	2.1836	0.00347935	0.0841091
Shank2	0.368496	0.021485	0.29016
Syne1	0.588169	0.0128218	0.210668
Vip	0.617849	0.0265433	0.325622
Map3k5	0.463355	0.010364	0.181941
Ptprk	0.374944	0.0255311	0.319333
Soga3	0.524808	0.000131762	0.00531386
Gja1	0.476966	0.00717416	0.144133
Shc2	0.316149	0.000963289	0.0298329
Abca7	0.376587	0.0102923	0.181263
Abhd17a	0.321751	0.0496666	0.452905
Zfr2	0.590229	0.000875193	0.0277325
Nuak1	0.554794	0.00613916	0.128695
Mybpc1	0.992846	3.65719e-05	0.00172003
Trhde	0.678456	0.00424936	0.0974149
Tbc1d30	0.563615	0.0315808	0.357002
R3hdm2	0.374278	0.00264139	0.0675887
Prr36	0.409046	0.0135984	0.219246
Tmco3	0.324749	0.0470392	0.441248
Tmem255b	1.31053	0.0377171	0.391829
Polb	0.273604	0.0274352	0.331118
Ikbkb	0.224345	0.0200216	0.27931
Dlc1	0.286279	0.0119118	0.201152
Ing2	0.555168	0.00102986	0.0312459
Mast3	0.353066	0.0178394	0.25982
Slc27a1	0.396274	0.0290942	0.342086
Nwd1	0.481767	0.0322457	0.362138
Rnf150	0.336063	0.0140806	0.224813
Tbc1d9	0.214428	0.0291708	0.342312
Gpt2	0.566618	0.00158346	0.0446578
Has3	1.11956	0.0151675	0.237105
Maf	0.416296	0.00147668	0.0423006
Spata2l	0.733642	0.00642303	0.132948
2310022B05Rik	0.60393	0.0332426	0.366601
Abhd6	0.36469	0.0114945	0.196123
Fezf2	0.515824	0.00369547	0.0877821
Extl3	0.377816	0.00209736	0.0561599
Rhobtb2	0.479899	0.0353483	0.378478
Dmtn	0.558568	0.00850648	0.161044
Cldn10	0.436895	0.0482372	0.447831
Hs6st3	0.567798	0.0440941	0.427456
Gramd1b	0.242257	0.0459037	0.435025
Cyp11a1	1.06859	0.0211627	0.287347
Coro2b	0.317045	0.00566822	0.121301
Fam81a	0.590667	0.0121291	0.203358
Mlip	0.793601	0.00726465	0.144686
Twf2	0.437628	0.0487213	0.450035
Grm2	0.579695	0.016879	0.250687
Bsn	0.638351	0.000189428	0.00735054
Amt	0.385089	0.0164785	0.247464
Zfp651	0.402606	0.0388902	0.397474
Dusp18	0.388016	0.00828158	0.157696
Spred2	0.371377	0.000326329	0.0117464
Slit3	0.387604	0.045789	0.434829
Lsm11	0.550313	0.000853241	0.0271944
Slc36a1	0.328443	0.0336981	0.368327
Rnf112	0.52825	0.0378593	0.392225
Car4	0.945058	0.000762864	0.0246975
Tom1l1	0.80503	6.34592e-06	0.00037877
Acsf2	0.368531	0.0397284	0.401994
Nxph3	0.712508	0.0249265	0.315698
Fam171a2	0.314395	0.0444803	0.42947
Gm11627	1.26092	0.0199486	0.27931
Fzd2	0.810979	0.016805	0.25008
Fmnl1	0.595025	0.00143841	0.0413183
Fam20a	0.471277	0.0221902	0.294208
Abca9	1.03631	0.00229824	0.0604539
Chrm3	0.506627	0.0361914	0.383503
Ryr2	0.466369	0.00298081	0.0749264
Gpx6	3.16891	0.0214959	0.29016
Gfod1	0.610684	2.42715e-05	0.00121833
Shc3	0.622017	0.0231369	0.301404
Dbn1	0.259218	0.0412754	0.411101
1700001L19Rik	0.627619	0.0238905	0.307318
Brd9	0.281267	0.0356806	0.379724
Homer1	0.923745	0.00255208	0.0657611
Hcn1	0.392867	0.00350592	0.0845025
Lratd1	0.473695	0.0403328	0.404344
Ntsr2	0.464803	0.00661487	0.136061
Adi1	0.379068	0.00920779	0.169057
Agmo	0.570315	0.0313196	0.355518
Etv1	0.453615	0.0376056	0.391305
Fbxo33	0.419609	0.0091935	0.169057
Trim9	0.34439	0.0339335	0.369353
Frmd6	0.594134	9.90313e-05	0.00413613
Rab15	0.475998	0.0104907	0.183576
Exd2	0.597408	0.0266345	0.326252
Traf3	0.466475	0.0220672	0.293509
C1qtnf3	4.91366	0.0018557	0.0509354
Drosha	0.345154	0.0247029	0.314321
Dnah5	0.888193	0.0174656	0.256882
Oxr1	0.48494	0.0100987	0.18008
Rspo2	0.787307	0.0221137	0.293509
Tmem74	0.495917	0.0366317	0.386174
Trmt12	0.369816	0.0261302	0.323845
Asap1	0.318125	0.0451906	0.432507
Khdrbs3	0.475699	1.2148e-06	8.52182e-05
Arc	1.56067	0.046261	0.437906
Ly6e	0.594084	0.0225592	0.297419
Gpt	0.638766	0.0314344	0.355838
Zc3h7b	0.299246	0.0471249	0.441248
Mpped1	0.491901	0.0266718	0.326466
Phf21b	1.17857	0.00472604	0.106119
Prickle1	0.5265	0.000650603	0.0216174
Olfr287	0.833815	0.0101471	0.18008
Map6d1	0.435297	0.0459005	0.435025
Tmem44	0.688949	0.0169315	0.251051
Kalrn	0.636361	0.0223046	0.295317
Boc	0.637139	0.00605557	0.127105
Usp25	0.340789	0.00189483	0.0515782
Decr2	0.300736	0.0453168	0.43271
Syngap1	0.429682	0.0282936	0.336042
Ilrun	0.357541	0.0280005	0.334461
Mapk14	0.271038	0.0475191	0.442667
Akap8l	0.403877	0.0343114	0.371741
Cyp4f15	0.708115	0.0165961	0.249003
Prrt1	0.502451	0.0186296	0.26753
Atf6b	0.388469	0.0327701	0.363701
2310061I04Rik	0.353618	0.00948209	0.17274
Gtpbp2	0.279915	0.00568254	0.121449
Dlk2	0.518816	0.0324205	0.362612
Ttbk1	0.38485	1.72282e-05	0.000909274
Cul9	0.464359	0.00355175	0.0854816
Pex6	0.440507	0.0203544	0.281227
Satb1	0.610101	0.00195199	0.0529585
Dpp9	0.324045	0.0148257	0.233092
Plin3	0.490761	0.00807635	0.154685
Tmem178	0.816492	1.26896e-05	0.000698947
Kcnk12	0.79765	0.00919435	0.169057
Osbpl1a	0.765094	0.0204318	0.281822
Camk4	0.780689	0.0143949	0.227629
Pcdha9	0.75455	0.00864533	0.163484
Aldh7a1	0.254755	0.0452307	0.432507
Synpo	0.805745	3.881e-06	0.00024691
Mapk4	0.440601	0.00152451	0.0433679
Sptbn2	0.525032	0.00727804	0.144686
Tmem151a	0.341355	0.0255372	0.319333
Cox8a	0.255166	0.0456075	0.434223
Mark2	0.230264	0.0454235	0.433478
Chrm1	0.6057	0.0216217	0.291139
Plpp6	0.389422	0.0476582	0.443459
Pten	0.303925	0.0363763	0.384765
Pank1	0.349501	0.0209337	0.285624
Hif1an	0.362162	0.0167335	0.249785
Adrb1	0.544853	0.0242334	0.309306
