# Supplementary material for: Effect of Celastrol on LncRNAs and mRNAs Profiles of Cerebral Ischemia-Reperfusion Injury in Transient Middle Cerebral Artery Occlusion Mice Model
Source: Front Neurosci. 2022 May 23;16:889292. doi: 10.3389/fnins.2022.889292 (PMC9169531; doi:10.3389/fnins.2022.889292)
Supplement: Supplementary file 7 [file Table_7.XLSX]

## Sheet: Sheet1
gene_name	log2FoldChange	pvalue	padj
Lactb2	-0.283546	0.036941	0.387501
Mrps9	-0.214533	0.0327067	0.363701
Fzd5	-1.46716	8.82692e-05	0.0037438
Cryba2	-3.20549	0.00721125	0.144524
B3gnt7	-1.52272	0.0175062	0.257249
Marco	-3.66113	0.0161978	0.244367
AA986860	-0.709319	0.0103428	0.181764
Slamf8	-2.56043	0.00709604	0.142941
Batf3	-1.20608	0.0398732	0.402283
Il1f9	-3.55945	0.00791189	0.152604
Notch1	-0.619266	0.00880599	0.164814
Mymk	-1.68057	0.0450401	0.43208
Sardh	-0.477617	0.0166267	0.249102
Wdr5	-0.226401	0.0437384	0.424741
Ass1	-0.466754	0.0330715	0.365546
Rpl35	-0.412873	0.00526284	0.114693
Trp53i11	-0.725791	0.00325767	0.0800469
Il1a	-1.67502	0.009763	0.176487
Il1b	-2.01467	0.00574391	0.122001
Slc4a11	-0.905006	0.0410942	0.409545
Pcna	-0.323392	0.00265229	0.0676294
6820408C15Rik	-0.722831	0.0441441	0.427482
Pdrg1	-0.653537	0.0135651	0.21915
Ghrh	-3.0746	0.0393124	0.4004
Lama5	-0.730079	0.0338955	0.369185
Rbm3	-0.881175	0.000108534	0.00451008
Ssxb8	-4.62832	0.00344891	0.0836194
Cybb	-1.09549	0.0372722	0.389425
Hmgb3	-0.947102	0.00400293	0.0931973
Gab3	-0.94577	0.0300356	0.345726
Las1l	-0.296897	0.014825	0.233092
Rtl9	-1.23745	0.000359556	0.0127882
Mid1	-1.33356	0.0183567	0.265235
Pkia	-0.27074	0.0196914	0.277676
Sirpb1b	-3.95357	0.0323825	0.36257
Actl6a	-0.542363	0.0122346	0.2045
Lhfp	-0.503352	0.00121751	0.0358191
Nhlrc3	-0.493494	0.0207126	0.283786
Wwtr1	-0.746632	0.0102483	0.18106
Ssr3	-0.32489	0.0133697	0.217438
Fga	-2.65745	0.0287794	0.339601
Sfrp2	-1.21468	0.0190969	0.271627
Cd1d1	-1.71589	0.000725812	0.023591
ETV3L	-2.52153	0.0484547	0.44904
Dpm3	-0.985613	0.0404022	0.404344
Adam15	-0.571948	0.000322736	0.0116426
S100a16	-0.575435	0.0133604	0.217438
S100a10	-0.618788	0.00182107	0.0503157
Mtmr11	-1.48083	5.49605e-15	9.70024e-13
Slc16a1	-0.496474	0.0290227	0.34149
Cttnbp2nl	-0.305159	0.0387209	0.397208
Cym	-2.32493	0.0448918	0.431161
Prok1	-2.04688	0.0187122	0.268481
Tmem167b	-0.212256	0.0489662	0.450485
Amy1	-0.515127	0.0200261	0.27931
Cnn3	-0.647979	0.00670914	0.13748
Adh1	-2.13602	0.0273418	0.330964
Adgrl4	-0.345352	0.0264815	0.325565
Lrrc40	-0.276002	0.0278574	0.333761
Car9	-1.62743	0.0281586	0.335898
Xpa	-0.38285	0.0466978	0.439736
Col27a1	-0.89305	0.0274995	0.331409
Col16a1	-0.546071	0.00520253	0.114011
Zdhhc18	-0.337675	0.0057455	0.122001
Rps6ka1	-0.328078	0.0359382	0.381558
Hmgn2	-0.462546	0.00027218	0.010017
Pithd1	-0.289131	0.0432661	0.421466
Eloa	-0.30576	0.0197805	0.278454
Atg9b	-1.13396	0.00279703	0.0707404
Insig1	-0.440584	0.0297958	0.344551
Tacc3	-0.993034	0.00101296	0.0310391
Nop14	-0.297851	0.0199801	0.27931
Cxcl10	-3.55591	0.0403758	0.404344
Rpl5	-0.234528	0.0360262	0.381999
Oas1g	-4.28627	0.00370357	0.0878475
Denr	-0.308921	0.002433	0.0634902
Zbed5	-0.676894	0.00411439	0.0951178
Lat2	-0.80451	0.0356395	0.379724
Ccl24	-1.89049	0.0324724	0.362696
Orai2	-0.511974	0.0133796	0.217438
Slc12a9	-0.278818	0.0356102	0.379724
Micall2	-1.30357	0.00304891	0.076149
Ppp1r17	-2.44637	0.0324822	0.362696
Polr1a	-0.18054	0.0416668	0.412745
D6Ertd527e	-2.54374	0.0324305	0.362612
1810020O05Rik	-1.36895	0.00786934	0.15214
Cnbp	-0.207332	0.047484	0.442667
Txnrd3	-0.582445	0.029898	0.345116
Slc41a3	-0.781804	0.0227471	0.298696
Tmem43	-0.314351	0.0194056	0.274522
Hnrnpf	-0.382279	0.0309839	0.352684
Usp18	-1.34852	0.0123309	0.20569
Mfap5	-1.77711	0.0397491	0.401994
Cd9	-0.650168	0.0338868	0.369185
Bhlhe41	-1.02615	6.86866e-05	0.00302258
Prpf31	-0.284887	0.0107662	0.18641
Chmp2a	-0.166077	0.0458301	0.434829
Lig1	-0.442959	0.00781576	0.15167
Eml2	-0.338776	0.0273965	0.331118
Klc3	-1.54805	3.27886e-05	0.00156451
Itpkc	-1.09395	0.00510124	0.112543
Ccer2	-1.40975	0.0332563	0.366601
Wdr62	-0.887668	0.0242168	0.309306
Hspb6	-1.34081	0.00153571	0.0436109
Ftl1	-1.434	1.78812e-06	0.000121282
Ush1c	-2.37394	0.00224851	0.0593362
Phox2a	-4.12468	9.15311e-05	0.00385918
Ampd3	-0.598551	0.0217603	0.291808
1110004F10Rik	-0.21116	0.0480223	0.446594
Rps15a	-0.228486	0.0134103	0.217722
Hsd3b7	-4.46939	1.07854e-05	0.000604206
Ascl2	-2.46475	0.0100471	0.17984
Sgpl1	-0.399464	0.0242127	0.309306
Lss	-0.583123	0.0223128	0.295317
Ptbp1	-0.547898	0.0160325	0.243241
Prtn3	-1.18907	0.020098	0.279449
Cirbp	-0.634579	0.00180601	0.0499896
Rtcb	-0.299552	0.000210623	0.00800268
Btg1	-0.331223	0.0206575	0.283506
Rxylt1	-0.325914	0.00508771	0.11246
Tac2	-0.762672	0.00304704	0.076149
Tmem198b	-1.15197	0.000403289	0.0142663
F7	-2.13258	0.0262057	0.324145
Plekha2	-0.822287	0.0010695	0.0322106
Primpol	-0.715605	0.00879991	0.164814
Palld	-0.630459	0.0192112	0.272779
Snx20	-0.818721	0.0447423	0.430594
Ces1d	-3.66499	0.0116168	0.197594
Mt2	-4.99222	1.00634e-14	1.73875e-12
Cngb1	-1.63115	0.0423268	0.415774
Slc12a4	-0.488061	0.0248253	0.315145
Rbm34	-0.261915	0.0170971	0.252821
Syt15	-0.847507	0.0485129	0.44912
Ptgdr	-1.12105	0.0386848	0.397106
Pnp	-0.607889	0.0172403	0.254481
Arhgef40	-0.616328	0.00759004	0.148845
Dhrs1	-0.518432	0.000265306	0.00980794
Nop9	-0.337997	0.0343817	0.372257
Pinx1	-0.495797	0.0270847	0.329066
Elf1	-0.514683	0.027648	0.33236
Acod1	-4.19149	0.00941601	0.171918
Fut4	-1.10226	0.0384202	0.395627
Acp5	-1.94762	0.0057338	0.122001
Kcnj5	-2.0272	0.00795981	0.153168
Oaf	-0.608609	0.0112688	0.193075
Tmem202	-1.13753	0.00120121	0.0355896
Spg21	-0.308577	0.00362491	0.0868603
Bcl2a1b	-1.68636	0.0193969	0.274522
Il20rb	-1.0135	0.017876	0.25989
Mapkapk3	-0.800121	0.0224293	0.296421
Ccr2	-1.9944	0.01761	0.258311
Slc35e4	-0.368473	0.0113049	0.193492
Ranbp17	-0.561649	0.00394442	0.092359
Slc22a4	-0.60649	0.0320141	0.360436
Pdlim4	-1.09606	0.000493827	0.0170287
Hint1	-0.199998	0.027983	0.334461
Smtnl2	-1.24003	0.0205109	0.282437
Abhd15	-0.952484	0.016309	0.245244
Ccl12	-2.41556	0.0327242	0.363701
Ccl5	-2.68239	0.0248127	0.315145
Ccl3	-1.5692	0.0181515	0.263196
Lpo	-1.00467	0.0265803	0.325832
Pnpo	-0.58704	7.37355e-09	7.33512e-07
Fkbp10	-0.735496	0.00408101	0.0946126
Vat1	-0.661076	0.0159706	0.243241
Cacng5	-0.672941	0.0292799	0.342796
Sox9	-0.487515	0.0218704	0.292091
Otop2	-2.93526	0.0036879	0.0877293
Otop3	-4.05768	0.00695664	0.140971
Trim47	-0.984772	0.00631487	0.131706
Aanat	-1.33701	0.0261621	0.32385
Hmga1b	-0.830921	0.00182392	0.0503157
Lgals8	-0.40795	0.0380995	0.393807
S1pr3	-1.01729	0.00143987	0.0413183
Smad5	-0.390158	0.0229994	0.301046
Golm1	-0.510431	0.0142365	0.226212
Nsun2	-0.192299	0.0173957	0.256083
Cetn3	-0.304519	0.0081983	0.156655
Btf3	-0.331465	0.00880175	0.164814
Erbin	-0.689993	0.00286734	0.0724068
Cwc27	-0.742499	1.3587e-05	0.000745878
Rsad2	-1.90286	0.00682189	0.139099
Sh3yl1	-0.585486	0.014305	0.226644
Ccdc71l	-0.270287	0.0346179	0.373459
Dtd2	-0.404684	0.0225032	0.297159
Cdkl1	-0.493946	0.00183947	0.0505746
Psma3	-0.21328	0.03533	0.378478
Hif1a	-0.358726	0.00523518	0.114269
Rdh11	-0.345853	0.00428345	0.0980594
Gtf2a1	-0.226835	0.0322665	0.362138
Tdrd9	-1.46657	0.0181754	0.263311
Ahnak2	-1.29929	0.0303841	0.348515
Rpl30	-0.354975	0.000992774	0.0306304
Dscc1	-2.58191	0.0374916	0.390722
Cyb5r3	-0.65026	0.00121987	0.0358191
Twf1	-0.593982	0.000411384	0.0144902
Ano6	-0.56853	0.0423996	0.415774
Wnt10b	-1.57623	0.0498701	0.453752
Racgap1	-0.826264	0.0106012	0.184721
Krt90	-3.22584	0.0470631	0.441248
Gpr84	-1.07388	0.00973376	0.176487
Mcm4	-0.353663	0.0228442	0.299493
Ufd1	-0.258499	0.0493924	0.452463
B3gnt5	-1.41013	0.0201327	0.279469
Ehhadh	-0.593544	0.028259	0.336042
Btla	-1.05936	0.0235994	0.304529
Mrps6	-0.687886	0.026142	0.323845
Acat3	-0.981644	0.000123552	0.00504473
Tnfrsf12a	-0.960017	0.0362545	0.383924
Gfer	-0.368041	0.0215814	0.290835
Hmga1	-0.557694	0.0126339	0.208625
Slc37a1	-0.495974	0.0187292	0.26849
Psmb8	-1.26551	0.000513727	0.0176408
Tap2	-0.875536	0.000466402	0.0162537
Tnf	-1.83941	0.0271097	0.329126
H2-Q4	-1.62033	0.00256639	0.0660263
1700001C19Rik	-3.50529	0.0269206	0.327707
Ypel5	-0.303491	0.0466293	0.439736
Rbbp8	-0.82302	0.0228231	0.299455
Stard4	-0.678664	0.0278401	0.333761
Hbegf	-1.09541	0.00171988	0.0479289
Fchsd1	-0.646177	0.0155542	0.239951
Cdo1	-0.436395	0.0152191	0.237458
Malt1	-0.412502	0.0338254	0.36891
Nudt8	-3.75585	0.000619458	0.0207506
Fosl1	-3.48429	1.39866e-08	1.34255e-06
Ifit3	-1.04079	0.00293061	0.0737778
Ifit3b	-1.20156	0.00366086	0.0874662
Hhex	-0.899076	0.0111282	0.191315
