# Supplementary material for: Effect of Celastrol on LncRNAs and mRNAs Profiles of Cerebral Ischemia-Reperfusion Injury in Transient Middle Cerebral Artery Occlusion Mice Model
Source: Front Neurosci. 2022 May 23;16:889292. doi: 10.3389/fnins.2022.889292 (PMC9169531; doi:10.3389/fnins.2022.889292)
Supplement: Supplementary file 8 [file Table_8.XLSX]

## Sheet: cluster 3
gene_name	log2FoldChange	pvalue	padj
Gm13194	-1.34684	0.0155424	0.122758
Gm13883	-1.13188	0.0401828	0.252854
Rps15a-ps7	-0.476902	0.0300737	0.206133
Gm14342	-1.07621	0.032128	0.215326
Gm9009	-2.1324	0.0439405	0.270461
G530011O06Rik	-2.17812	0.0224422	0.160881
Gm12534	-4.88049	0.00214274	0.0241058
Gm15444	-2.70021	0.0292182	0.202488
Lrp8os2	-0.84118	0.0197207	0.14546
AB041806	-0.764805	0.0364596	0.237601
Gm29367	-0.865658	0.0138269	0.111847
Gm42595	-0.674846	0.0424657	0.263199
Clec7a	-1.7233	0.0039087	0.0397174
1700101I11Rik	-0.817825	0.0329859	0.219974
AC139131.1	-1.63999	0.00855818	0.0756255
Gm38973	-2.85937	0.00561697	0.0532369
Rps12-ps4	-1.25718	0.0268873	0.18772
AU020206	-0.599277	0.0422042	0.261881
Gm15880	-3.82406	0.0191677	0.142559
9330159M07Rik	-0.624369	0.032091	0.215326
Gm15892	-1.30782	0.00898837	0.0786935
Gm11696	-0.614116	0.0395103	0.250317
Hsp25-ps1	-1.28606	0.0144722	0.116082
Gm15691	-4.2401	0.00511479	0.049262
Gm47096	-1.06784	0.0491513	0.293428
4930413F20Rik	-3.53002	0.00701547	0.0645495
I730030J21Rik	-2.22684	0.0032873	0.0343148
Gm49745	-1.06951	0.0340988	0.226395
Gm8437	-1.13691	0.0365164	0.237601
1110038B12Rik	-0.451305	0.0465211	0.28277
Gm20522	-1.51801	0.038318	0.245153

## Sheet: cluster 5&6
gene_name	log2FoldChange	pvalue	padj
Gm37885	-2.35809	2.97e-09	1.71e-07
Gm12940	-0.567522	0.0022773	0.0254062
5830444B04Rik	3.5402	5.23e-06	0.000123277
Gm42738	-1.66358	0.0259415	0.181387
Gm10010	-0.894609	0.000341491	0.00492907
A230056P14Rik	3.12844	1.51e-43	4.04e-40
Gm17484	-0.812493	0.0411045	0.257444
Ccnb2-ps	7.42629	1.33e-09	9.12e-08
Gm48239	6.46832	5.34e-50	2.86e-46
Gm37637	2.39491	4.06e-08	1.71e-06
Gm2415	-0.692086	0.00324669	0.0339571
Gm12319	4.05927	6.26e-07	1.92e-05
A630019I02Rik	-2.39449	0.0329269	0.219855
Gm15879	-0.718036	0.0369135	0.239602
C030005K06Rik	-1.62033	0.0286928	0.199286
